# Supplementary material for: Unique mobile elements and scalable gene flow at the prokaryote–eukaryote boundary revealed by circularized Asgard archaea genomes
Source: Nat Microbiol. 2022 Jan 13;7(2):200–12. doi: 10.1038/s41564-021-01039-y (PMC8813620; doi:10.1038/s41564-021-01039-y)
Supplement: Source Data Extended Data Fig. 1 — Numerical data. [file 41564_2021_1039_MOESM11_ESM.xlsx]

## Sheet: Sheet1
ED Fig. 1a
Condition	Max AAG Fraction (%)
Original rock	0
ASW	0.27
ASW+Lactate	3.55
ASW+H2/CO2	0
ASW+Hexane	0
ASW+Decane	0.05
ED Fig. 1b
Condition	generation	Max AAG Fraction (%)
Lactate mixed	1	3.55
Lactate mixed	2	1.78
Lactate mixed	3	0.96
Lactate planktonic	2	0
Lactate planktonic	3	0
Lactate planktonic, nitrogen source free	3	0
H2/CO2 mixed	2	0
H2/CO2 mixed	3	0
H2/CO2 mixed	4	0
H2/CO2+Acetate mixed	2	0
H2/CO2+Acetate mixed	3	0
H2/CO2+Acetate mixed	4	0.1
Decane mixed	2	0.1
ED Fig. 1c
Dates since inoculation	Mixed %AAG	S.D.	Planktonic %AAG	S.D.
0	0	N.A.	N.A.	N.A.
77	0	0	0	0
120	0.0692	0.0256	0	0
212	1.7777	N.A.	0	0
ED Fig. 1c Inset
Treatment	AAG fraction
without treatment	0
sonicated	0.001
ED Fig. 1d
Dates since inoculation	OUT	S.D.	Shannon Index	S.D.
0	371	N.A.	0.6105	N.A.
77	149.5	7.7782	0.522	0.0252
120	155	21.2132	0.5446	0.0254
212	168	N.A.	0.5014	N.A.
ED Fig. 1e
Taxonomy	percent alignment	percent identity	dissimilarity	read count
Ca. Heimdallarchaeum endolithica PR6	100	100	0	2823
uncultured Woesearchaeota archaeon	68.55	100	31.45	2817
uncultured Thermoplasmata archaeon 1	70.02	100	29.98	1181
Ca. Harpocratesius repetitus FW102	72.39	99	28.3339	253
uncultured Thermoplasmata archaeon 2	68.02	89	39.4622	67
uncultured Methanophilus species	69.77	94	34.4162	52
