# Supplementary material for: Unique mobile elements and scalable gene flow at the prokaryote–eukaryote boundary revealed by circularized Asgard archaea genomes
Source: Nat Microbiol. 2022 Jan 13;7(2):200–12. doi: 10.1038/s41564-021-01039-y (PMC8813620; doi:10.1038/s41564-021-01039-y)
Supplement: Source Data Fig. 4 — Phylogenetic trees in Newick format. [file 41564_2021_1039_MOESM8_ESM.zip]

Archive with 9 entries (8 files):
- Fig4a_source_data_newick.txt
- __MACOSX/
- __MACOSX/._Fig4a_source_data_newick.txt
- Fig4b_source_data_newick.txt
- __MACOSX/._Fig4b_source_data_newick.txt
- Fig4d_source_data_newick.txt
- __MACOSX/._Fig4d_source_data_newick.txt
- Fig4c_source_data_newick.txt
- __MACOSX/._Fig4c_source_data_newick.txt
