# Supplementary material for: Unique mobile elements and scalable gene flow at the prokaryote–eukaryote boundary revealed by circularized Asgard archaea genomes
Source: Nat Microbiol. 2022 Jan 13;7(2):200–12. doi: 10.1038/s41564-021-01039-y (PMC8813620; doi:10.1038/s41564-021-01039-y)
Supplement: Source Data Fig. 4 — Phylogenetic trees in Newick format. [file 41564_2021_1039_MOESM8_ESM.zip › Fig4a_source_data_newick.txt]

((((((((((((IMGVR3contig1597627_56-VirTax-Duplodnaviria-Heunggongvirae-Uroviricota-Caudoviricetes-Caudovirales----HostTax-undefined:0.7310994569,IMGVR3contig1572758_79-VirTax-Duplodnaviria-Heunggongvirae-Uroviricota-Caudoviricetes-Caudovirales----HostTax-undefined:0.5528823031):0.1633384343[83],IMGVR3contig1648495_52-VirTax-undefined-HostTax-undefined:0.7035772895):0.1177870517[72],IMGVR3contig0614076_28-VirTax-Duplodnaviria-Heunggongvirae-Uroviricota-Caudoviricetes-Caudovirales----HostTax-undefined:0.9559294682):0.1643650447[84],IMGVR3contig1010174_14-VirTax-undefined-HostTax-undefined:1.0488682943):0.1114717130[62],((((((((((GCA_003543235_1231-dBacteria-pFirmicutesA-cClostridia-oLachnospirales-fAnaerotignaceae-gUBA8514-sUBA8514:0.3829475609,GCA_009784685_1113-dBacteria-pFirmicutesA-cClostridia-oLachnospirales-fWRBF01-gWRBF01-sWRBF01:0.3918621383):0.0755489317[62],GCA_900545305_815-dBacteria-pFirmicutesA-cClostridia-oLachnospirales-fCAG-274-gCAG-274-sCAG-274:0.3287117158):0.1203652594[63],((GCF_900766495_1064-dBacteria-pFirmicutesA-cClostridiaA-oChristensenellales-fBorkfalkiaceae-gHGM11416-sHGM11416:0.4091121014,(((((GCA_012837835_1205-dBacteria-pFirmicutesA-cClostridiaA-oChristensenellales-fCAG-74-gDTU024-sDTU024:0.1855124079,GCA_012837965_21-dBacteria-pFirmicutesA-cClostridiaA-oChristensenellales-fCAG-74-gDTU024-sDTU024:0.1577488456):0.0689903424[91],GCA_902788445_701-dBacteria-pFirmicutesA-cClostridiaA-oChristensenellales-fCAG-74-gRUG563-sRUG563:0.2104260117):0.1305727642[100],GCA_902781095_2329-dBacteria-pFirmicutesA-cClostridiaA-oChristensenellales-fCAG-74-gSFFH01-sSFFH01:0.2735664162):0.0275312315[73],(GCF_900754775_2347-dBacteria-pFirmicutesA-cClostridiaA-oChristensenellales-fCAG-74-gHGM11575-sHGM11575:0.1154158849,GCA_004557125_2475-dBacteria-pFirmicutesA-cClostridiaA-oChristensenellales-fCAG-74-gSFTH01-sSFTH01:0.1404957399):0.1622917875[100]):0.1160856803[97],GCA_002315655_438-dBacteria-pFirmicutesA-cClostridiaA-oChristensenellales-fUBA1750-gUBA7102-sUBA7102:0.3057693014):0.0425756251[66]):0.0560361834[64],GCA_002329335_1058-dBacteria-pFirmicutesA-cClostridiaA-oChristensenellales-fUBA1750-gUBA1428-sUBA1428:0.4286689982):0.0849742227[87]):0.0610977556[47],GCF_011959105_2752-dBacteria-pFirmicutesA-cClostridia-oLachnospirales-fLachnospiraceae-gAcetatifactor-sAcetatifactor:0.2752812763):0.0286287806[26],(GCA_012520635_1043-dBacteria-pFirmicutesA-cClostridia-oLachnospirales-fLachnospiraceae-gHerbinix-sHerbinix:0.1644434129,GCA_012518885_1412-dBacteria-pFirmicutesA-cClostridia-oLachnospirales-fLachnospiraceae-gJAAYRG01-sJAAYRG01:0.1768076601):0.0848954332[89]):0.0244064993[23],(((((GCA_002431355_143-dBacteria-pFirmicutesA-cClostridia-oLachnospirales-fLachnospiraceae-gOribacterium-sOribacterium:0.2209338609,((GCF_003043955_973-dBacteria-pFirmicutesA-cClostridia-oLachnospirales-fLachnospiraceae-gF0428-sF0428:0.2757756660,GCF_000242235_301-dBacteria-pFirmicutesA-cClostridia-oLachnospirales-fLachnospiraceae-gStomatobaculum-sStomatobaculum:0.1620271430):0.0757047474[83],GCA_002308115_299-dBacteria-pFirmicutesA-cClostridia-oLachnospirales-fLachnospiraceae-gUBA1267-sUBA1267:0.3307764369):0.0312861218[40]):0.0374395837[44],GCF_000238075_380-dBacteria-pFirmicutesA-cClostridia-oLachnospirales-fLachnospiraceae-gOribacterium-sOribacterium:0.3228741886):0.0599337812[72],GCA_014385265_1848-dBacteria-pFirmicutesA-cClostridia-oLachnospirales-fLachnospiraceae-gCAG-81-sCAG-81:0.2342209896):0.0422216827[55],GCF_902363445_936-dBacteria-pFirmicutesA-cClostridia-oLachnospirales-fLachnospiraceae-gNSJ-38-sNSJ-38:0.1817632540):0.0332366990[73],(GCA_902796415_500-dBacteria-pFirmicutesA-cClostridia-oLachnospirales-fLachnospiraceae-gAnaerobutyricum-sAnaerobutyricum:0.2169482679,GCA_001941025_55-dBacteria-pFirmicutesA-cClostridia-oLachnospirales-fLachnospiraceae-gEubacteriumI-sEubacteriumI:0.2113170825):0.0720401540[86]):0.0602669261[51]):0.0227090619[30],GCA_009774455_2322-dBacteria-pFirmicutesA-cClostridia-oLachnospirales-fLachnospiraceae-g14-2-s14-2:0.3785828427):0.0559397114[55],(GCA_900545175_360-dBacteria-pFirmicutesA-cClostridia-oLachnospirales-fLachnospiraceae-gCAG-882-sCAG-882:0.2748308923,GCF_003482105_1160-dBacteria-pFirmicutesA-cClostridia-oLachnospirales-fLachnospiraceae-gCoprococcus-sCoprococcus:0.2331482674):0.1176061118[97]):0.0837947345[46],GCF_007115105_3680-dBacteria-pFirmicutesA-cClostridia-oLachnospirales-fLachnospiraceae-gLacrimispora-sLacrimispora:0.5417731156):0.2036213406[84],GCF_900115735_1040-dBacteria-pFirmicutesA-cClostridia-oLachnospirales-fLachnospiraceae-gButyrivibrio-sButyrivibrio:0.7647232080):0.4711337558[100]):0.1425774110[82],IMGVR3contig2297946_127-VirTax-undefined-HostTax-Bacteria-Firmicutes-Clostridia-Clostridiales-Lachnospiraceae--:1.4659034864):0.1624609160[69],(GCA_004376295_1839-dArchaea-pThermoproteota-cBathyarchaeia-oB26-1-fBA1-gSOJZ01-sSOJZ01:1.1351238357,GCA_009774615_1757-dBacteria-pFirmicutesA-cClostridia-oLachnospirales-fLachnospiraceae-gUMGS1370-sUMGS1370:1.6841654936):0.2687586047[41]):0.0818997164[36],((IMGVR3contig2353923_13-VirTax-Duplodnaviria-Heunggongvirae-Uroviricota-Caudoviricetes-Caudovirales----HostTax-Bacteria-Actinobacteria-Actinobacteria-Bifidobacteriales-Bifidobacteriaceae-Bifidobacterium-:1.7962235821,GCF_002335805_3232-dBacteria-pFirmicutes-cBacilli-oBacillalesH-fBacillaceaeF-gFJAT-45350-sFJAT-45350:1.4719772283):0.1977392153[46],PAA001_GuaymasIMG01_blk009_contig258654_1:1.3528157112):0.1757640836[43]):0.0705483568[24],(GCA_002507565_1249-dBacteria-pFirmicutes-cBacilli-oPaenibacillales-fReconcilibacillaceae-gReconcilibacillus-sReconcilibacillus:1.1742907715,GCF_002019595_2128-dBacteria-pFirmicutes-cBacilli-oBacillales-fBacillaceaeH-gBacillusBA-sBacillusBA:1.1807162624):0.2390560952[61]):0.0508197374[29],(((((IMGVR3contig0429521_53-VirTax-undefined-HostTax-undefined:1.9982169884,IMGVR3contig2155265_2-VirTax-Duplodnaviria-Heunggongvirae-Uroviricota-Caudoviricetes-Caudovirales----HostTax-Bacteria-Candidatus:1.4571991532):0.1742214280[49],GCF_000183405_2101-dBacteria-pDeferribacterota-cDeferribacteres-oDeferribacterales-fCalditerrivibrionaceae-gCalditerrivibrio-sCalditerrivibrio:1.5156039702):0.1334187534[66],(((IMGVR3contig1692956_42-VirTax-undefined-HostTax-undefined:1.0994586055,(IMGVR3contig0094340_126-VirTax-undefined-HostTax-undefined:0.5891357347,IMGVR3contig1428884_12-VirTax-undefined-HostTax-undefined:0.7537108791):0.2938561817[97]):0.3948570943[99],GCA_003553305_669-dBacteria-pFirmicutesD-cDethiobacteria-oDTU022-fDTU022-gB1SED10-74M-sB1SED10-74M:1.2243501714):0.1254333289[62],GCF_008124605_2226-dArchaea-pHalobacteriota-cHalobacteria-oHalobacteriales-fHalobacteriaceae-gHalobacterium-sHalobacterium:1.4447996645):0.0000020842[25]):0.0385340366[50],(GCA_003497555_1717-dBacteria-pSpirochaetota-cUBA12135-oUBA12135-fUBA12135-gUBA12135-sUBA12135:1.4125678341,((GCA_002693085_1057-dBacteria-pBacteroidota-cBacteroidia-oFlavobacteriales-fFlavobacteriaceae-gMED-G14-sMED-G14:0.2958599352,GCA_004321735_793-dBacteria-pBacteroidota-cBacteroidia-oFlavobacteriales-fFlavobacteriaceae-gMED-G14-sMED-G14:0.3052988074):0.5875263065[100],(GCA_001516055_3167-dBacteria-pFirmicutesB-cDesulfitobacteriia-oDesulfitobacteriales-fSyntrophobotulaceae-gGracilibacter-sGracilibacter:0.7640519048,FWA024_FW4634_blk001_contig178_43:0.8655926860):0.3861744568[99]):0.1028906204[59]):0.1513437175[75]):0.0733290707[48],GCA_014075215_3537-dBacteria-pBacteroidota-cBacteroidia-oFlavobacteriales-fFlavobacteriaceae-gSCGC-AAA160-P02-sSCGC-AAA160-P02:1.7955607773):0.0859378823[50]):0.0517949352[28],((((((IMGVR3contig0089662_3-VirTax-undefined-HostTax-undefined:0.8289982980,(IMGVR3contig1685654_35-VirTax-undefined-HostTax-undefined:0.9841910498,GCA_013203725_344-dBacteria-pPatescibacteria-cABY1-oSG8-24-fUBA11717-gJABMPK01-sJABMPK01:1.6390709510):0.0978039191[34]):0.1322129510[35],IMGVR3contig0054831_7-VirTax-Monodnaviria-Loebvirae-Hofneiviricota-Faserviricetes-Tubulavirales-Inoviridae---HostTax-undefined:1.0628074834):0.0648823351[36],((IMGVR3contig0078820_6-VirTax-undefined-HostTax-undefined:0.9909790788,(GCA_013152575_953-dArchaea-pThermoproteota-cThermoproteia-oSulfolobales-fAcidilobaceae-gJAADGB01-sJAADGB01:1.1785353286,GCF_001050195_1960-dBacteria-pChloroflexota-cAnaerolineae-oAnaerolineales-fAnaerolineaceae-gAnaerolinea-sAnaerolinea:0.9949550754):0.1405447179[41]):0.0312554153[30],(GCF_900113715_1714-dBacteria-pFirmicutesC-cNegativicutes-oSelenomonadales-fSelenomonadaceae-gSelenomonasA-sSelenomonasA:0.3000260471,GCF_000687995_195-dBacteria-pFirmicutesC-cNegativicutes-oSelenomonadales-fSelenomonadaceae-gSelenomonasA-sSelenomonasA:0.2266624952):0.7854292220[100]):0.1440383854[76]):0.1363997099[52],((((IMGVR3contig0428706_1-VirTax-undefined-HostTax-undefined:0.7807554692,GCF_013618635_3379-dBacteria-pFirmicutes-cBacilli-oBacillalesD-fHalobacillaceae-gCUG-92003-sCUG-92003:0.5793886622):0.5206723688[100],((((((GCA_002455975_1847-dBacteria-pFirmicutesA-cClostridia-oClostridiales-fClostridiaceae-gClostridiumJ-sClostridiumJ:0.1280594369,GCF_003718715_435-dBacteria-pFirmicutesA-cClostridia-oClostridiales-fClostridiaceae-gJN-1-sJN-1:0.3049902530):0.3024126079[100],(GCA_008125075_732-dBacteria-pFirmicutesA-cClostridia-oAcetivibrionales-fAcetivibrionaceae-gHerbivorax-sHerbivorax:0.3341888923,GCF_002029235_1250-dBacteria-pFirmicutesA-cClostridia-oClostridiales-fClostridiaceae-gClostridiumAE-sClostridiumAE:0.4679654323):0.1224970756[84]):0.4860204095[100],(GCF_003013475_6176-dBacteria-pFirmicutes-cBacilli-oBrevibacillales-fBrevibacillaceae-gBrevibacillus-sBrevibacillus:0.5455961950,GCF_005222705_5325-dBacteria-pFirmicutes-cBacilli-oPaenibacillales-fPaenibacillaceae-gPaenibacillusC-sPaenibacillusC:0.5420578339):0.1765361480[95]):0.1247027581[73],((GCF_003003125_916-dBacteria-pFirmicutes-cBacilli-oThermoactinomycetales-fThermoactinomycetaceae-gLaceyella-sLaceyella:0.3214039664,GCF_900156045_1716-dBacteria-pFirmicutes-cBacilli-oBacillalesB-fDSM-1321-gPeribacillus-sPeribacillus:0.5800494092):0.2176362289[100],GCF_001439635_3706-dBacteria-pFirmicutes-cBacilli-oBacillalesA-fPlanococcaceae-gSolibacillus-sSolibacillus:0.7768968860):0.0822420114[73]):0.0730666593[53],(GCF_000503775_5175-dBacteria-pFirmicutes-cBacilli-oBrevibacillales-fBrevibacillaceae-gBrevibacillus-sBrevibacillus:0.7150945146,GCA_002243605_731-dBacteria-pFirmicutes-cBacilli-oBacillales-fAnoxybacillaceae-gGeobacillus-sGeobacillus:1.3056325804):0.2818928826[97]):0.0571260673[43],((GCF_001026695_3299-dBacteria-pFirmicutes-cBacilli-oBacillalesB-fDSM-18226-gNeobacillus-sNeobacillus:0.3142503130,GCA_001311865_16-dBacteria-pFirmicutes-cBacilli-oBacillalesD-fAlkalibacillaceae-gPiscibacillus-sPiscibacillus:0.5187575407):0.0817896423[53],GCF_002156385_3524-dBacteria-pFirmicutes-cBacilli-oBacillalesH-fBacillaceaeD-g45385-s45385:0.4763438847):0.4586336488[100]):0.0615663065[32]):0.1085280139[67],((((GCA_012839815_1320-dBacteria-pFirmicutesG-cSHA-98-oCh115-fJABLXJ01-gJABLXL01-sJABLXL01:0.3824080598,GCA_012839815_1467-dBacteria-pFirmicutesG-cSHA-98-oCh115-fJABLXJ01-gJABLXL01-sJABLXL01:0.4310419543):0.1500187106[66],(GCF_000300195_247-dBacteria-pFirmicutesA-cClostridia-oClostridiales-fClostridiaceae-gClostridiumJ-sClostridiumJ:0.8865291618,FWA018_PR1007_blk001_contig251_108:0.6597601355):0.0918458961[41]):0.1616390080[57],((GCA_013178045_463-dBacteria-pFirmicutesB-cSyntrophomonadia-oCh66-fCh66-gCh66-sCh66:0.3065826242,GCF_900176005_1873-dBacteria-pFirmicutesB-cMoorellia-oMoorellales-fMoorellaceae-gThermanaeromonas-sThermanaeromonas:0.3091746513):0.1369431435[96],GCF_900129075_102-dBacteria-pFirmicutesA-cThermoanaerobacteria-oCaldanaerobiales-fCaldanaerobiaceae-gCaldanaerobius-sCaldanaerobius:0.4392867705):0.2050941697[96]):0.3837853666[99],(GCF_001553115_964-dBacteria-pFirmicutesA-cClostridia-oTissierellales-fPeptoniphilaceae-gPeptoniphilusC-sPeptoniphilusC:0.2134238624,GCF_902363535_758-dBacteria-pFirmicutesA-cClostridia-oTissierellales-fPeptoniphilaceae-gPeptoniphilusC-sPeptoniphilusC:0.2096857537):1.1874573180[100]):0.2944406686[96]):0.1457590476[88],(IMGVR3contig2303088_92-VirTax-Duplodnaviria-Heunggongvirae-Uroviricota-Caudoviricetes-Caudovirales----HostTax-Bacteria-Firmicutes-Clostridia-Clostridiales-Lachnospiraceae-Anaerostipes-Anaerostipes:1.0607337175,((((((IMGVR3contig1149199_23-VirTax-undefined-HostTax-Bacteria-Firmicutes-Bacilli-Bacillales-Bacillaceae-Bacillus-:0.2835008202,(((GCF_004123195_237-dBacteria-pFirmicutes-cBacilli-oAneurinibacillales-fRAOX-1-gYIM-78166-sYIM-78166:0.2710439280,(GCF_004764705_453-dBacteria-pFirmicutes-cBacilli-oPaenibacillales-fPaenibacillaceae-gR196-sR196:0.3967394888,GCF_000993825_2456-dBacteria-pFirmicutes-cBacilli-oPaenibacillales-fPaenibacillaceae-gPaenibacillus-sPaenibacillus:0.5757150480):0.0597891021[66]):0.0429048233[52],GCF_003710935_3365-dBacteria-pFirmicutes-cBacilli-oBrevibacillales-fBrevibacillaceae-gBrevibacillus-sBrevibacillus:0.2320112450):0.0708934112[84],GCA_014640555_7239-dBacteria-pFirmicutes-cBacilli-oPaenibacillales-fPaenibacillaceae-gPaenibacillusE-sPaenibacillusE:0.2742224904):0.0701904931[74]):0.0338822986[65],GCF_001015055_5560-dBacteria-pFirmicutes-cBacilli-oAneurinibacillales-fAneurinibacillaceae-gAneurinibacillusA-sAneurinibacillusA:0.1914053737):0.0724340357[72],(GCF_009720625_949-dBacteria-pFirmicutes-cBacilli-oBacillales-fBacillaceae-gMetabacillus-sMetabacillus:0.1919900337,(GCF_013867725_529-dBacteria-pFirmicutes-cBacilli-oThermoactinomycetales-fThermoactinomycetaceae-gPaenactinomyces-sPaenactinomyces:0.3030851729,GCF_003367505_2507-dBacteria-pFirmicutes-cBacilli-oBacillalesA-fPlanococcaceae-gLysinibacillus-sLysinibacillus:0.5469532970):0.0645488419[63]):0.0632677181[60]):0.0867567267[75],(GCF_900100785_3930-dBacteria-pFirmicutesB-cDesulfitobacteriia-oDesulfitobacteriales-fDesulfitobacteriaceae-gDesulfosporosinus-sDesulfosporosinus:0.2456424770,(GCF_000144645_993-dBacteria-pFirmicutesA-cThermosediminibacteria-oThermosediminibacterales-fThermosediminibacteraceae-gThermosediminibacter-sThermosediminibacter:0.2153310088,((GCF_001485475_2026-dBacteria-pFirmicutesA-cThermosediminibacteria-oThermosediminibacterales-fTepidanaerobacteraceae-gTepidanaerobacter-sTepidanaerobacter:0.2450361027,GCF_000747665_151-dBacteria-pFirmicutesA-cThermoanaerobacteria-oThermoanaerobacterales-fThermoanaerobacteraceae-gThermoanaerobacterium-sThermoanaerobacterium:0.3249445269):0.0263399115[51],GCF_001310975_2597-dBacteria-pFirmicutesA-cThermoanaerobacteria-oThermoanaerobacterales-fThermoanaerobacteraceae-gThermoanaerobacter-sThermoanaerobacter:0.3446308857):0.1655115246[100]):0.1084343003[80]):0.0567341167[46]):0.0481467549[44],GCF_009932395_1805-dBacteria-pFirmicutesB-cDesulfotomaculia-oDesulfotomaculales-fDesulfotomaculaceaeA-gSporotomaculum-sSporotomaculum:0.2884643210):0.1756961830[94],(GCF_900113125_609-dBacteria-pFirmicutes-cBacilli-oBacillalesD-fHalobacillaceae-gHalobacillus-sHalobacillus:0.3259862046,((GCF_001420605_2610-dBacteria-pFirmicutes-cBacilli-oBacillales-fBacillaceaeG-gGottfriedia-sGottfriedia:0.6411682355,GCF_004138295_499-dBacteria-pFirmicutes-cBacilli-oBacillales-fBacillaceaeG-gEctobacillus-sEctobacillus:0.3160064562):0.1262249764[97],GCF_002577655_1683-dBacteria-pFirmicutes-cBacilli-oBacillales-fBacillaceae-gMetabacillus-sMetabacillus:0.3783495057):0.0949227294[90]):0.2516251913[100]):0.5034184048[100]):0.2080130988[85]):0.0633738770[71]):0.1293457014[74],GCA_003166955_289-dBacteria-pAcidobacteriota-cAcidobacteriae-oAcidobacteriales-fAcidobacteriaceae-gPalsa-343-sPalsa-343:1.8857136681):0.0676292946[32],((GCA_003577245_407-dBacteria-pChloroflexota-cDehalococcoidia-oUBA2991-fUBA2991-gUCB2-sUCB2:0.7541790502,PAA018_GuaymasIMG18_blk002_contig12692_8:0.6972240630):0.2207823541[88],FWA014_FW4249mh_blk002_contig229836_3:1.0197614291):0.3945314821[89]):0.0752916442[26]):0.0732004944[60],((((((IMGVR3contig0239663_17-VirTax-undefined-HostTax-undefined:1.3208477575,((IMGVR3contig0334595_19-VirTax-Duplodnaviria-Heunggongvirae-Uroviricota-Caudoviricetes-Caudovirales----HostTax-undefined:0.5099771279,(GCA_003223115_7616-dBacteria-pAcidobacteriota-cAcidobacteriae-oBryobacterales-fBryobacteraceae-gQHXW01-sQHXW01:0.3063772966,GCA_010084195_1225-dBacteria-pAcidobacteriota-cAcidobacteriae-oBryobacterales-fBryobacteraceae-gBOG-234-sBOG-234:0.5238611944):0.2721984766[98]):0.1240521345[53],GCA_003223875_2013-dBacteria-pAcidobacteriota-cAcidobacteriae-o20CM-2-55-15-f20CM-2-55-15-g20CM-2-55-15-s20CM-2-55-15:0.5104560637):0.4640270752[100]):0.1827637088[70],GCA_013287135_1471-dBacteria-pAcidobacteriota-cAcidobacteriae-oUBA7541-fUBA7541-gPalsa-295-sPalsa-295:0.8856260032):0.4893575758[99],(((IMGVR3contig0127981_1-VirTax-undefined-HostTax-undefined:1.6990891125,((GCF_003858635_703-dBacteria-pBacteroidota-cBacteroidia-oCytophagales-fSpirosomaceae-gLarkinella-sLarkinella:0.2874425710,GCF_002108455_3698-dBacteria-pBacteroidota-cBacteroidia-oCytophagales-fSpirosomaceae-gFibrella-sFibrella:0.2801819248):0.6442798320[100],GCA_003559475_165-dBacteria-pBacteroidota-cBacteroidia-oBacteroidales-fUBA7960-gPWLF01-sPWLF01:1.2226233768):0.3875473200[97]):0.1516064353[80],IMGVR3contig0911582_49-VirTax-undefined-HostTax-Bacteria-Bacteroidetes-Bacteroidia-Bacteroidales-Dysgonamonadaceae-Proteiniphilum-Proteiniphilum:1.8433464547):0.1201099033[45],GCF_002954265_4321-dBacteria-pBacteroidota-cBacteroidia-oChitinophagales-fChitinophagaceae-gFlavipsychrobacter-sFlavipsychrobacter:1.5311709140):0.2023925688[89]):0.0930227063[18],(((((IMGVR3contig1588957_10-VirTax-Duplodnaviria-Heunggongvirae-Uroviricota-Caudoviricetes-Caudovirales----HostTax-undefined:0.4522105582,((IMGVR3contig2277134_104-VirTax-Duplodnaviria-Heunggongvirae-Uroviricota-Caudoviricetes-Caudovirales----HostTax-undefined:0.3542943229,(IMGVR3contig2269939_28-VirTax-Duplodnaviria-Heunggongvirae-Uroviricota-Caudoviricetes-Caudovirales----HostTax-Bacteria-Firmicutes-Clostridia-Clostridiales-Lachnospiraceae-Blautia-Blautia:0.4579149329,IMGVR3contig1587348_15-VirTax-Duplodnaviria-Heunggongvirae-Uroviricota-Caudoviricetes-Caudovirales----HostTax-undefined:0.3782764634):0.1392272583[74]):0.1145306443[60],IMGVR3contig1605939_11-VirTax-undefined-HostTax-undefined:0.8000630324):0.2131508604[95]):1.0823387290[100],IMGVR3contig1816753_6-VirTax-undefined-HostTax-undefined:1.6065539551):0.4021803828[97],GCA_900319885_256-dBacteria-pElusimicrobiota-cElusimicrobia-oElusimicrobiales-fElusimicrobiaceae-gUBA1436-sUBA1436:1.4545865401):0.0927256173[14],(IMGVR3contig0817234_5-VirTax-Duplodnaviria-Heunggongvirae-Uroviricota-Caudoviricetes-Caudovirales-Podoviridae---HostTax-undefined:2.1505337326,GCF_001184205_4082-dBacteria-pDesulfobacterota-cDesulfarculia-oDesulfarculales-fDesulfarculaceae-gDesulfocarbo-sDesulfocarbo:1.1659469668):0.3281479528[85]):0.0588422423[13],(IMGVR3contig1022454_29-VirTax-undefined-HostTax-undefined:1.2169749130,FWA021_PR1041_blk004_contig78190_1:0.9237120303):0.3184954020[88]):0.1265785581[17]):0.1051270120[22],(FWA013_FW4244mh_blk008_contig1075245_2:0.1651980737,FWA005_FW4147SP_blk001_contig19_149:0.2715752351):1.0118949550[100]):0.1495467389[44],((GCA_011389765_1744-dBacteria-pDesulfobacterota-cDesulfovibrionia-oDesulfovibrionales-fDesulfohalobiaceae-gJAABTT01-sJAABTT01:0.4046067833,PAA002_GuaymasIMG02_blk008_contig240100_1:0.5164698285):1.5030999580[100],((((((IMGVR3contig1130683_28-VirTax-Duplodnaviria-Heunggongvirae-Uroviricota-Caudoviricetes-Caudovirales----HostTax-undefined:1.3721351358,GCA_013376985_3731-dBacteria-pBacteroidota-cBacteroidia-oBacteroidales-fBBW3-gUBA8529-sUBA8529:0.7681168597):0.3151113595[84],(((IMGVR3contig0249846_8-VirTax-undefined-HostTax-undefined:0.6073476110,((((IMGVR3contig1466900_6-VirTax-undefined-HostTax-undefined:0.4072981223,IMGVR3contig1094479_73-VirTax-Duplodnaviria-Heunggongvirae-Uroviricota-Caudoviricetes-Caudovirales----HostTax-undefined:0.4147240564):0.1074270466[97],IMGVR3contig2256131_46-VirTax-undefined-HostTax-undefined:0.4491875569):0.2440357652[100],(IMGVR3contig0900074_22-VirTax-undefined-HostTax-undefined:0.3350834374,GCA_903917425_3725-dBacteria-pBacteroidota-cBacteroidia-oBacteroidales-fLentimicrobiaceae-gUBA4417-sUBA4417:0.5591714562):0.1792077218[92]):0.4059858317[100],IMGVR3contig0273541_32-VirTax-undefined-HostTax-Bacteria-Bacteroidetes-Flavobacteriia-Flavobacteriales-Flavobacteriaceae-Capnocytophaga-:0.8721113833):0.2128064071[88]):0.2022920619[87],((IMGVR3contig0096799_54-VirTax-Duplodnaviria-Heunggongvirae-Uroviricota-Caudoviricetes-Caudovirales----HostTax-undefined:0.8042670996,(IMGVR3contig0094248_1-VirTax-undefined-HostTax-undefined:0.3119174381,IMGVR3contig1815246_4-VirTax-undefined-HostTax-undefined:0.5600388351):0.1543459593[66]):0.3162357010[100],((IMGVR3contig1215160_4-VirTax-undefined-HostTax-undefined:0.9119034216,GCA_900318245_1182-dBacteria-pBacteroidota-cBacteroidia-oBacteroidales-fPaludibacteraceae-gRF16-sRF16:0.7635915427):0.2668069583[85],GCA_009787485_1586-dBacteria-pBacteroidota-cBacteroidia-oBacteroidales-fWCHB1-69-gUBA5429-sUBA5429:0.8473876448):0.1650687402[61]):0.1480566472[50]):0.0596433911[43],PAA003_GuaymasIMG03_blk007_contig214582_1:0.8291580602):0.3377886481[99]):0.2342432849[76],(GCA_001890965_585-dBacteria-pBacteroidota-cBacteroidia-oCytophagales-fMicroscillaceae-gMicroscilla-sMicroscilla:0.9990352519,GCA_004322015_3019-dBacteria-pBacteroidota-cBacteroidia-oChitinophagales-fChitinophagaceae-gFW021-bin31-sFW021-bin31:1.3716274849):0.4236841033[86]):0.0410708185[45],IMGVR3contig1457986_1-VirTax-undefined-HostTax-undefined:1.3422145690):0.2245505082[91],((((((GCF_001911425_1076-dBacteria-pBacteroidota-cBacteroidia-oSphingobacteriales-fSphingobacteriaceae-gMucilaginibacter-sMucilaginibacter:0.4142503501,((GCF_003432065_4105-dBacteria-pBacteroidota-cBacteroidia-oSphingobacteriales-fSphingobacteriaceae-gMucilaginibacter-sMucilaginibacter:0.2908582889,GCA_013286325_414-dBacteria-pBacteroidota-cBacteroidia-oSphingobacteriales-fSphingobacteriaceae-gMucilaginibacter-sMucilaginibacter:0.2171370758):0.0391667085[75],GCA_002413785_2396-dBacteria-pBacteroidota-cBacteroidia-oSphingobacteriales-fSphingobacteriaceae-gMucilaginibacter-sMucilaginibacter:0.1634058186):0.0993821107[92]):0.0551773455[75],GCF_009755275_1031-dBacteria-pBacteroidota-cBacteroidia-oSphingobacteriales-fSphingobacteriaceae-gMucilaginibacter-sMucilaginibacter:0.4717815922):0.0247178800[32],GCA_014635825_2995-dBacteria-pBacteroidota-cBacteroidia-oSphingobacteriales-fSphingobacteriaceae-gMucilaginibacter-sMucilaginibacter:0.2481619747):0.0468938718[44],GCF_003635105_399-dBacteria-pBacteroidota-cBacteroidia-oSphingobacteriales-fSphingobacteriaceae-gMucilaginibacter-sMucilaginibacter:0.2372856333):0.1174562219[91],GCF_000422945_76-dBacteria-pBacteroidota-cBacteroidia-oSphingobacteriales-fSphingobacteriaceae-gDaejeonella-sDaejeonella:0.2664815800):0.2907810735[100],GCF_000302595_2868-dBacteria-pBacteroidota-cBacteroidia-oSphingobacteriales-fSphingobacteriaceae-gPelobium-sPelobium:0.4519641868):1.2573739300[100]):0.1763967432[84],(FWV0001_rast_peg0032_00301aa:0.8788208204,FWA017_FW4636_blk001_contig547_9:0.9086363705)OROOT:0.8720678504[100]):0.2319686686[95]):0.2062289842[73]):0.0732004944);
