# Supplementary material for: Unique mobile elements and scalable gene flow at the prokaryote–eukaryote boundary revealed by circularized Asgard archaea genomes
Source: Nat Microbiol. 2022 Jan 13;7(2):200–12. doi: 10.1038/s41564-021-01039-y (PMC8813620; doi:10.1038/s41564-021-01039-y)
Supplement: Source Data Fig. 4 — Phylogenetic trees in Newick format. [file 41564_2021_1039_MOESM8_ESM.zip › Fig4b_source_data_newick.txt]

(FWV0002_rast_peg0004_00426aa:0.2487170390,(((IMGVR3contig0708334_35-VirTax-undefined-HostTax-undefined:0.3897829690,FWA016_FW4633_blk001_contig64_51:0.2052462800):0.0637058854[87],((((((IMGVR3contig0733201_15-VirTax-Duplodnaviria-Heunggongvirae-Uroviricota-Caudoviricetes-Caudovirales----HostTax-Bacteria-Firmicutes-Clostridia-Clostridiales-Peptococcaceae-Desulfofarcimen-:0.2212014149,(((IMGVR3contig0982082_51-VirTax-undefined-HostTax-undefined:0.2546307280,GCF_002272895_940-dBacteria-pCampylobacterota-cCampylobacteria-oCampylobacterales-fHelicobacteraceae-gHelicobacterJ-sHelicobacterJ:0.4262677566):0.0933623672[60],(GCA_009778915_828-dBacteria-pElusimicrobiota-cElusimicrobia-oElusimicrobiales-fElusimicrobiaceae-gElusimicrobium-sElusimicrobium:0.1867678594,GCA_001462245_1611-dBacteria-pFibrobacterota-cFibrobacteria-oFibrobacterales-fFibrobacteraceae-gFibromonas-sFibromonas:0.2712921794):0.1028456309[96]):0.0221796123[41],GCF_900760665_999-dBacteria-pVerrucomicrobiota-cVerrucomicrobiae-oOpitutales-fCAG-312-gCAG-312-sCAG-312:0.2407618422):0.1238605976[97]):0.1036537893[97],((((IMGVR3contig2371749_28-VirTax-Duplodnaviria-Heunggongvirae-Uroviricota-Caudoviricetes-Caudovirales-Siphoviridae-Brussowvirus--HostTax-Bacteria-Firmicutes-Bacilli-Lactobacillales-Streptococcaceae-Streptococcus-:0.4008678353,(IMGVR3contig1772140_8-VirTax-Duplodnaviria-Heunggongvirae-Uroviricota-Caudoviricetes-Caudovirales----HostTax-undefined:0.2994469426,((IMGVR3contig2260136_16-VirTax-undefined-HostTax-Bacteria-Proteobacteria-Betaproteobacteria-Burkholderiales-Sutterellaceae-Sutterella-:0.3776569439,IMGVR3contig1132723_34-VirTax-Duplodnaviria-Heunggongvirae-Uroviricota-Caudoviricetes-Caudovirales----HostTax-undefined:0.3326796194):0.0678420686[64],(GCF_902143515_2516-dBacteria-pFirmicutesA-cClostridia-oClostridiales-fClostridiaceae-gHathewaya-sHathewaya:0.1776509753,GCA_002408885_274-dBacteria-pVerrucomicrobiota-cLentisphaeria-oVictivallales-fVictivallaceae-gUBA5239-sUBA5239:0.4249348359):0.0587718328[70]):0.0381608492[54]):0.0757401579[56]):0.1703048115[100],((IMGVR3contig1799705_24-VirTax-undefined-HostTax-Bacteria-Proteobacteria-Betaproteobacteria-Neisseriales-Chromobacteriaceae-Chitiniphilus-Chitiniphilus:0.3585501409,IMGVR3contig0634728_23-VirTax-Duplodnaviria-Heunggongvirae-Uroviricota-Caudoviricetes-Caudovirales----HostTax-undefined:0.3851006382):0.0605680510[62],GCF_001261715_1328-dBacteria-pBacteroidota-cBacteroidia-oBacteroidales-fDysgonomonadaceae-gDysgonomonas-sDysgonomonas:0.2799998688):0.1135185344[97]):0.0726660554[86],GCA_009780035_531-dBacteria-pProteobacteria-cAlphaproteobacteria-oWRAU01-fWRAU01-gWRAU01-sWRAU01:0.4797977899):0.0547846266[76],(((IMGVR3contig1604869_156-VirTax-undefined-HostTax-Bacteria-Fusobacteria-Fusobacteriia-Fusobacteriales-Fusobacteriaceae-Fusobacterium-Fusobacterium:0.2973209293,(((IMGVR3contig1663765_28-VirTax-undefined-HostTax-undefined:0.1456339355,(GCA_900542035_1466-dBacteria-pFirmicutesA-cClostridia-oLachnospirales-fLachnospiraceae-gUMGS1370-sUMGS1370:0.4435651425,GCF_900142645_2144-dBacteria-pFirmicutesA-cClostridia-oEubacteriales-fEubacteriaceae-gEubacterium-sEubacterium:0.3956969275):0.0537277549[42]):0.1131678605[69],GCF_003071345_660-dBacteria-pBacteroidota-cBacteroidia-oChitinophagales-fChitinophagaceae-gChitinophaga-sChitinophaga:0.4003218411):0.1242750126[100],GCA_900551585_1124-dBacteria-pProteobacteria-cAlphaproteobacteria-oRF32-fCAG-239-gCAG-495-sCAG-495:0.2661091946):0.0643590952[55]):0.0375776923[71],(((IMGVR3contig0357073_19-VirTax-Duplodnaviria-Heunggongvirae-Uroviricota-Caudoviricetes-Caudovirales----HostTax-Bacteria-Proteobacteria-Epsilonproteobacteria-Campylobacterales-Campylobacteraceae-Campylobacter-:0.2094744486,IMGVR3contig0355890_12-VirTax-undefined-HostTax-undefined:0.3097148325):0.0844479860[97],IMGVR3contig1685389_60-VirTax-Duplodnaviria-Heunggongvirae-Uroviricota-Caudoviricetes-Caudovirales----HostTax-undefined:0.3201889600):0.1005251138[100],(((IMGVR3contig2208712_43-VirTax-Duplodnaviria-Heunggongvirae-Uroviricota-Caudoviricetes-Caudovirales----HostTax-Bacteria-Firmicutes-Clostridia-Clostridiales-Peptostreptococcaceae-Peptostreptococcus-Peptostreptococcus:0.2133769606,IMGVR3contig0196573_123-VirTax-Duplodnaviria-Heunggongvirae-Uroviricota-Caudoviricetes-Caudovirales----HostTax-Bacteria-Firmicutes-Clostridia-Clostridiales-Clostridiaceae-Clostridium-:0.3838013455):0.0802041136[59],IMGVR3contig0573159_11-VirTax-Duplodnaviria-Heunggongvirae-Uroviricota-Caudoviricetes-Caudovirales----HostTax-undefined:0.4603128837):0.0899650136[54],((IMGVR3contig2358260_6-VirTax-Duplodnaviria-Heunggongvirae-Uroviricota-Caudoviricetes-Caudovirales----HostTax-Bacteria-Candidatus:0.3049126497,(IMGVR3contig0228496_15-VirTax-Duplodnaviria-Heunggongvirae-Uroviricota-Caudoviricetes-Caudovirales-Siphoviridae-Unahavirus--HostTax-undefined:0.2240671250,GCA_000436795_639-dBacteria-pBacteroidota-cBacteroidia-oBacteroidales-fBacteroidaceae-gPhocaeicola-sPhocaeicola:0.4693520125):0.1181046975[92]):0.1233456667[84],GCF_001969855_2453-dBacteria-pFirmicutes-cBacilli-oBacillales-fBacillaceae-gBacillus-sBacillus:0.6596630441):0.0653669334[45]):0.1742815132[100]):0.1334427941[94]):0.1301881421[99],IMGVR3contig1548599_18-VirTax-Duplodnaviria-Heunggongvirae-Uroviricota-Caudoviricetes-Caudovirales----HostTax-undefined:0.6347511610):0.1944269892[100]):0.0646462478[87]):0.1603991275[100],((IMGVR3contig1157650_8-VirTax-Duplodnaviria-Heunggongvirae-Uroviricota-Caudoviricetes-Caudovirales-Myoviridae---HostTax-undefined:0.6552199592,((IMGVR3contig1314923_4-VirTax-Duplodnaviria-Heunggongvirae-Uroviricota-Caudoviricetes-Caudovirales----HostTax-undefined:0.3185122637,IMGVR3contig1818510_37-VirTax-Duplodnaviria-Heunggongvirae-Uroviricota-Caudoviricetes-Caudovirales----HostTax-undefined:0.3683553738):0.3590682887[100],((IMGVR3contig0291420_30-VirTax-Duplodnaviria-Heunggongvirae-Uroviricota-Caudoviricetes-Caudovirales----HostTax-Bacteria-Proteobacteria-Betaproteobacteria-unclassified-unclassified-Candidatus:0.2099732620,GCF_009176975_1833-dBacteria-pProteobacteria-cAlphaproteobacteria-oRhizobiales-fRhizobiaceae-gAureimonasA-sAureimonasA:0.3315083944):0.1365859669[78],GCF_001270295_4179-dBacteria-pProteobacteria-cGammaproteobacteria-oBurkholderiales-fBurkholderiaceae-gAchromobacter-sAchromobacter:0.3118848085):0.3586612497[100]):0.1303215479[79]):0.0726585197[59],GCF_007004655_2974-dBacteria-pProteobacteria-cGammaproteobacteria-oPseudomonadales-fCellvibrionaceae-gExilibacterium-sExilibacterium:0.3673008751):0.1579483367[96]):0.0575110489[45],(((((IMGVR3contig0174421_5-VirTax-undefined-HostTax-undefined:0.1741854408,IMGVR3contig1642047_152-VirTax-Duplodnaviria-Heunggongvirae-Uroviricota-Caudoviricetes-Caudovirales----HostTax-undefined:0.2837535844):0.1326895552[98],((GCA_001724175_3054-dBacteria-pBacteroidota-cBacteroidia-oCytophagales-fSpirosomaceae-gSCN-52-12-sSCN-52-12:0.1507078989,GCF_011030385_2982-dBacteria-pBacteroidota-cBacteroidia-oFlavobacteriales-fCrocinitomicaceae-gUBA5422-sUBA5422:0.2039337913):0.1373783903[100],GCF_000242935_4461-dBacteria-pVerrucomicrobiota-cVerrucomicrobiae-oOpitutales-fOpitutaceae-gGeminisphaera-sGeminisphaera:0.2435110297):0.0876680130[87]):0.0457818437[55],(IMGVR3contig0273910_2-VirTax-undefined-HostTax-undefined:0.5448288601,GCA_013286285_1398-dBacteria-pProteobacteria-cAlphaproteobacteria-oRickettsiales-fSXRF01-gJABCZZ01-sJABCZZ01:0.3763817027):0.0520177320[33]):0.0631668729[60],(((IMGVR3contig1257634_27-VirTax-undefined-HostTax-undefined:0.2614919870,GCF_000022125_1550-dBacteria-pDesulfobacterota-cDesulfovibrionia-oDesulfovibrionales-fDesulfovibrionaceae-gDesulfovibrio-sDesulfovibrio:0.3656137836):0.0667692182[77],(IMGVR3contig1217942_2-VirTax-undefined-HostTax-undefined:0.2886590853,GCA_903837595_3736-dBacteria-pProteobacteria-cGammaproteobacteria-oChromatiales-fChromatiaceae-gThiodictyon-sThiodictyon:0.3214772703):0.0529554269[61]):0.0149598678[31],((IMGVR3contig1009939_15-VirTax-Duplodnaviria-Heunggongvirae-Uroviricota-Caudoviricetes-Caudovirales----HostTax-undefined:0.5452161398,((GCF_002954715_4192-dBacteria-pProteobacteria-cGammaproteobacteria-oEnterobacterales-fVibrionaceae-gAliivibrio-sAliivibrio:0.3402503322,(GCF_000272105_4268-dBacteria-pProteobacteria-cGammaproteobacteria-oEnterobacterales-fVibrionaceae-gVibrio-sVibrio:0.3344046133,GCF_000817815_1575-dBacteria-pProteobacteria-cGammaproteobacteria-oEnterobacterales-fVibrionaceae-gVibrio-sVibrio:0.2119867918):0.1155419308[93]):0.0762336702[71],GCF_004295345_1617-dBacteria-pProteobacteria-cGammaproteobacteria-oEnterobacterales-fShewanellaceae-gShewanella-sShewanella:0.3787852343):0.1476279688[100]):0.0978715219[87],GCA_002690445_4055-dArchaea-pNanoarchaeota-cNanoarchaeia-oPacearchaeales-fARS1160-gARS10-sARS10:0.4522795741):0.0747015431[70]):0.0704761085[69]):0.1518673645[95],(((((((IMGVR3contig0697645_9-VirTax-Duplodnaviria-Heunggongvirae-Uroviricota-Caudoviricetes-Caudovirales-Siphoviridae---HostTax-undefined:0.1612552231,IMGVR3contig1811668_116-VirTax-undefined-HostTax-undefined:0.3361363658):0.0401689179[80],IMGVR3contig1429773_103-VirTax-undefined-HostTax-undefined:0.5145440704):0.0307743936[35],(IMGVR3contig1436801_57-VirTax-Duplodnaviria-Heunggongvirae-Uroviricota-Caudoviricetes-Caudovirales----HostTax-undefined:0.2043851726,IMGVR3contig2205432_40-VirTax-Duplodnaviria-Heunggongvirae-Uroviricota-Caudoviricetes-Caudovirales----HostTax-undefined:0.4234070603):0.0658415148[84]):0.0589049930[50],((IMGVR3contig0091534_38-VirTax-Varidnaviria-Bamfordvirae-Nucleocytoviricota------HostTax-undefined:0.3474358217,IMGVR3contig1345882_50-VirTax-Duplodnaviria-Heunggongvirae-Uroviricota-Caudoviricetes-Caudovirales----HostTax-undefined:0.2413464074):0.1249807122[96],(((((((IMGVR3contig1300799_32-VirTax-Duplodnaviria-Heunggongvirae-Uroviricota-Caudoviricetes-Caudovirales----HostTax-undefined:0.3066085683,(IMGVR3contig0093084_44-VirTax-Duplodnaviria-Heunggongvirae-Uroviricota-Caudoviricetes-Caudovirales-Siphoviridae---HostTax-undefined:0.2922005450,IMGVR3contig0075245_57-VirTax-undefined-HostTax-undefined:0.3132526800):0.0641697604[52]):0.0492190238[86],IMGVR3contig0969613_2-VirTax-undefined-HostTax-undefined:0.3765264898):0.0242988468[21],((((IMGVR3contig1325710_47-VirTax-Duplodnaviria-Heunggongvirae-Uroviricota-Caudoviricetes-Caudovirales----HostTax-Bacteria-Proteobacteria-Gammaproteobacteria-Oceanospirillales-Halomonadaceae-Halomonas-Halomonas:0.2061363650,(IMGVR3contig0754430_15-VirTax-Duplodnaviria-Heunggongvirae-Uroviricota-Caudoviricetes-Caudovirales----HostTax-undefined:0.2377913484,IMGVR3contig2361460_37-VirTax-Duplodnaviria-Heunggongvirae-Uroviricota-Caudoviricetes-Caudovirales----HostTax-undefined:0.3225498685):0.0495401209[69]):0.0942312703[92],IMGVR3contig1330587_38-VirTax-Duplodnaviria-Heunggongvirae-Uroviricota-Caudoviricetes-Caudovirales----HostTax-undefined:0.2781010026):0.0837028532[88],IMGVR3contig1614727_54-VirTax-undefined-HostTax-undefined:0.2539513651):0.0416850349[87],IMGVR3contig1813093_44-VirTax-Duplodnaviria-Heunggongvirae-Uroviricota-Caudoviricetes-Caudovirales----HostTax-undefined:0.5815228297):0.0573562223[87]):0.0154096086[38],(IMGVR3contig1675580_1-VirTax-Duplodnaviria-Heunggongvirae-Uroviricota-Caudoviricetes-Caudovirales----HostTax-undefined:0.2348514246,IMGVR3contig0991118_10-VirTax-Duplodnaviria-Heunggongvirae-Uroviricota-Caudoviricetes-Caudovirales----HostTax-undefined:0.4339433500):0.0629954039[71]):0.0491475089[78],(IMGVR3contig0989488_39-VirTax-Duplodnaviria-Heunggongvirae-Uroviricota-Caudoviricetes-Caudovirales----HostTax-undefined:0.2517370797,IMGVR3contig1822253_19-VirTax-undefined-HostTax-undefined:0.3298057919):0.0634774115[67]):0.0592152578[72],IMGVR3contig0155836_20-VirTax-undefined-HostTax-undefined:0.2767254791):0.1031477141[99],IMGVR3contig0390830_6-VirTax-Duplodnaviria-Heunggongvirae-Uroviricota-Caudoviricetes-Caudovirales----HostTax-undefined:0.3473601688):0.1346358934[90]):0.0124097791[26]):0.0399623446[81],((IMGVR3contig1135657_24-VirTax-Duplodnaviria-Heunggongvirae-Uroviricota-Caudoviricetes-Caudovirales----HostTax-Bacteria-Spirochaetes-----:0.3468176626,IMGVR3contig1140309_89-VirTax-undefined-HostTax-undefined:0.3795409200):0.1198469628[80],((((((IMGVR3contig1619250_118-VirTax-Duplodnaviria-Heunggongvirae-Uroviricota-Caudoviricetes-Caudovirales----HostTax-undefined:0.2408784365,IMGVR3contig0169098_5-VirTax-undefined-HostTax-undefined:0.2929428924):0.0431796755[43],(IMGVR3contig2360109_68-VirTax-Duplodnaviria-Heunggongvirae-Uroviricota-Caudoviricetes-Caudovirales----HostTax-undefined:0.2829132098,IMGVR3contig1340662_52-VirTax-undefined-HostTax-undefined:0.2758638005):0.0445652747[71]):0.0346227144[43],IMGVR3contig1325353_18-VirTax-Duplodnaviria-Heunggongvirae-Uroviricota-Caudoviricetes-Caudovirales----HostTax-undefined:0.4133983371):0.0434921783[71],((IMGVR3contig1732740_26-VirTax-Duplodnaviria-Heunggongvirae-Uroviricota-Caudoviricetes-Caudovirales----HostTax-undefined:0.3356307300,(IMGVR3contig1238864_46-VirTax-Duplodnaviria-Heunggongvirae-Uroviricota-Caudoviricetes-Caudovirales----HostTax-undefined:0.3056490296,(GCF_000373905_2048-dBacteria-pActinobacteriota-cActinomycetia-oMycobacteriales-fMycobacteriaceae-gMycobacterium-sMycobacterium:0.2285211538,GCF_003674045_1774-dBacteria-pActinobacteriota-cActinomycetia-oStreptomycetales-fStreptomycetaceae-gStreptomyces-sStreptomyces:0.3736823696):0.2232528324[100]):0.0876582507[64]):0.0220383306[37],((IMGVR3contig0808080_36-VirTax-undefined-HostTax-undefined:0.2690949812,IMGVR3contig1834253_22-VirTax-undefined-HostTax-undefined:0.4589416418):0.0687722069[76],FWA003_FW4391Hyb_blk002_contig2903_2:0.3261555426):0.0206114952[24]):0.0406243314[44]):0.0510756488[37],(((IMGVR3contig1095935_20-VirTax-Varidnaviria-Bamfordvirae-Nucleocytoviricota-Megaviricetes-Imitervirales-Mimiviridae---HostTax-undefined:0.2476174125,GCA_003526375_1875-dBacteria-pVerrucomicrobiota-cLentisphaeria-oVictivallales-fUBA1829-gUBA11452-sUBA11452:0.2340258213):0.0191790716[43],IMGVR3contig0632604_59-VirTax-undefined-HostTax-undefined:0.3866810041):0.0422592627[47],IMGVR3contig0320407_49-VirTax-undefined-HostTax-undefined:0.2645298718):0.0551989319[46]):0.0309022165[36],(IMGVR3contig0081277_55-VirTax-undefined-HostTax-undefined:0.2715338890,IMGVR3contig1826504_2-VirTax-Duplodnaviria-Heunggongvirae-Uroviricota-Caudoviricetes-Caudovirales-Siphoviridae---HostTax-Bacteria-Proteobacteria-Gammaproteobacteria-Alteromonadales-Alteromonadaceae-Marinobacter-:0.4641938166):0.0886481824[72]):0.0280491247[37]):0.0375302066[38]):0.0162050354[46],((IMGVR3contig1240532_5-VirTax-Duplodnaviria-Heunggongvirae-Uroviricota-Caudoviricetes-Caudovirales----HostTax-undefined:0.2986831644,IMGVR3contig1330341_44-VirTax-undefined-HostTax-undefined:0.5574888758):0.0617600089[74],(IMGVR3contig0146233_14-VirTax-Duplodnaviria-Heunggongvirae-Uroviricota-Caudoviricetes-Caudovirales----HostTax-undefined:0.3985219713,IMGVR3contig0969508_5-VirTax-Duplodnaviria-Heunggongvirae-Uroviricota-Caudoviricetes-Caudovirales----HostTax-undefined:0.3394151837):0.1031680207[96]):0.1124092042[98]):0.0314846739[48],((((IMGVR3contig0924271_7-VirTax-undefined-HostTax-undefined:0.2848539551,IMGVR3contig1409217_38-VirTax-Duplodnaviria-Heunggongvirae-Uroviricota-Caudoviricetes-Caudovirales----HostTax-undefined:0.2339426341):0.0759880344[58],IMGVR3contig0271500_6-VirTax-undefined-HostTax-undefined:0.2973094702):0.0610580742[69],(IMGVR3contig2256617_45-VirTax-Duplodnaviria-Heunggongvirae-Uroviricota-Caudoviricetes-Caudovirales----HostTax-Bacteria-Firmicutes-Erysipelotrichia-Erysipelotrichales-Erysipelotrichaceae-Coprobacillus-:0.2806485854,IMGVR3contig0733274_52-VirTax-undefined-HostTax-Archaea-Euryarchaeota-Methanomicrobia-Methanosarcinales-Methanosarcinaceae-Methanosarcina-:0.3100629096):0.1161428730[69]):0.1310135657[96],(((IMGVR3contig0313255_630-VirTax-undefined-HostTax-undefined:0.3799276119,IMGVR3contig0291402_59-VirTax-Duplodnaviria-Heunggongvirae-Uroviricota-Caudoviricetes-Caudovirales----HostTax-undefined:0.3459625187):0.0684130364[60],IMGVR3contig0092064_69-VirTax-Duplodnaviria-Heunggongvirae-Uroviricota-Caudoviricetes-Caudovirales----HostTax-Bacteria-Firmicutes-unclassified-unclassified-unclassified-unclassified-:0.3471068580):0.0423992250[49],(GCA_002069785_1934-dBacteria-pVerrucomicrobiota-cLentisphaeria-oVictivallales-fUBA1829-gUBA11452-sUBA11452:0.4756588918,(GCF_901472505_7-dBacteria-pProteobacteria-cGammaproteobacteria-oEnterobacterales-fEnterobacteriaceae-gProteus-sProteus:0.3676888173,GCF_003697165_799-dBacteria-pProteobacteria-cGammaproteobacteria-oEnterobacterales-fEnterobacteriaceae-gEscherichia-sEscherichia:0.2796628922):0.3126596954[100]):0.0987849853[80]):0.0436238060[34]):0.0785196052[99]):0.2659569988[100]):0.0865244918[65]):0.0689536854[51],((((((IMGVR3contig1226317_20-VirTax-Duplodnaviria-Heunggongvirae-Uroviricota-Caudoviricetes-Caudovirales-Siphoviridae---HostTax-undefined:0.6087529258,(GCF_000449425_4608-dBacteria-pFirmicutesA-cClostridia-oPeptostreptococcales-fPeptostreptococcaceae-gClostridioides-sClostridioides:0.2857979493,GCF_003858585_851-dBacteria-pFirmicutes-cBacilli-oErysipelotrichales-fErysipelotrichaceae-gRQZE01-sRQZE01:0.2765937390):0.1920547309[100]):0.0902045431[79],((IMGVR3contig1452882_12-VirTax-Duplodnaviria-Heunggongvirae-Uroviricota-Caudoviricetes-Caudovirales-Siphoviridae---HostTax-undefined:0.3071520116,IMGVR3contig2353544_58-VirTax-Duplodnaviria-Heunggongvirae-Uroviricota-Caudoviricetes-Caudovirales----HostTax-undefined:0.3016718341):0.0431110356[54],(GCA_900553405_1288-dBacteria-pFirmicutesA-cClostridia-oTANB77-fCAG-508-gUMGS1663-sUMGS1663:0.1870319904,GCA_004552515_1115-dBacteria-pFirmicutesA-cClostridiaA-oChristensenellales-fCAG-74-gFirm-10-sFirm-10:0.3152508462):0.0529059732[50]):0.0567668583[93]):0.0537473808[67],((IMGVR3contig1768680_93-VirTax-undefined-HostTax-undefined:0.2304169781,GCF_003149675_1039-dArchaea-pMethanobacteriota-cMethanobacteria-oMethanobacteriales-fMethanobacteriaceae-gMethanosphaera-sMethanosphaera:0.3484377708):0.1239357837[84],(((IMGVR3contig0072557_58-VirTax-Duplodnaviria-Heunggongvirae-Uroviricota-Caudoviricetes-Caudovirales----HostTax-undefined:0.3175954738,((IMGVR3contig1338573_12-VirTax-Duplodnaviria-Heunggongvirae-Uroviricota-Caudoviricetes-Caudovirales----HostTax-undefined:0.5564866253,GCF_000466385_4569-dBacteria-pFirmicutes-cBacilli-oAneurinibacillales-fAneurinibacillaceae-gAneurinibacillus-sAneurinibacillus:0.1690311638):0.0266490918[34],(GCA_014385195_543-dBacteria-pFirmicutesA-cClostridia-oTissierellales-fTissierellaceae-gBX21-sBX21:0.1233022340,GCF_000732605_1311-dBacteria-pFirmicutesA-cClostridia-oLachnospirales-fLachnospiraceae-gLacrimispora-sLacrimispora:0.3493178514):0.0376335730[59]):0.0467478769[55]):0.0186666379[62],FWA021_PR1041_blk001_contig479_3:0.2815214706):0.0235928373[45],GCA_012800655_699-dBacteria-pFirmicutesA-cClostridia-oSaccharofermentanales-fFastidiosipilaceae-gJAAZIX01-sJAAZIX01:0.3543257711):0.0291489559[71]):0.0575157587[63]):0.0320106899[41],IMGVR3contig1286218_13-VirTax-Duplodnaviria-Heunggongvirae-Uroviricota-Caudoviricetes-Caudovirales----HostTax-undefined:0.4513489129):0.0538177450[65],(GCF_001885735_1390-dBacteria-pFirmicutes-cBacilli-oLactobacillales-fEnterococcaceae-gEnterococcusC-sEnterococcusC:0.3019452386,GCF_005771635_1119-dBacteria-pFirmicutes-cBacilli-oZOR0006-fVBWP01-gVBWP01-sVBWP01:0.3333204600):0.1939750075[100]):0.3294323024[100],GCF_009797885_2116-dBacteria-pBacteroidota-cBacteroidia-oFlavobacteriales-fFlavobacteriaceae-gCroceivirga-sCroceivirga:0.6757489085):0.0840552276[42]):0.0482721799[62],FWA026_FW4911spades_blk001_contig3805_3:0.5431730485):0.0711901080[83]):0.0594383916[84],(IMGVR3contig0540427_34-VirTax-undefined-HostTax-undefined:0.4777840076,IMGVR3contig0422746_23-VirTax-Duplodnaviria-Heunggongvirae-Uroviricota-Caudoviricetes-Caudovirales----HostTax-undefined:0.7039056308):0.1164346564[78]):0.0779837110[61],FWA024_FW4634_blk001_contig4083_7:0.3189114500)OROOT;
