# Supplementary material for: Unique mobile elements and scalable gene flow at the prokaryote–eukaryote boundary revealed by circularized Asgard archaea genomes
Source: Nat Microbiol. 2022 Jan 13;7(2):200–12. doi: 10.1038/s41564-021-01039-y (PMC8813620; doi:10.1038/s41564-021-01039-y)
Supplement: Source Data Fig. 4 — Phylogenetic trees in Newick format. [file 41564_2021_1039_MOESM8_ESM.zip › Fig4c_source_data_newick.txt]

((((((((((ASG069_Hodarchaeota090_rast_peg4786_00281aa:0.6717508698,(GCA_002868865_694-dBacteria-pDesulfobacterotaF-cDesulfuromonadia-oDesulfuromonadales-fGeopsychrobacteraceae-gBM509-sBM509:0.6126327298,(GCA_009885845_2658-dBacteria-pDesulfobacterotaF-cDesulfuromonadia-oGeobacterales-fPseudopelobacteraceae-gPseudopelobacter-sPseudopelobacter:0.5165781149,GCA_010029825_1160-dBacteria-pBdellovibrionota-cOligoflexia-oOligoflexales-fRGVZ01-gRGVZ01-sRGVZ01:0.8861912953):0.1526895038[84]):0.1502882802[68]):0.0589509140[51],GCA_002722705_1247-dBacteria-pBdellovibrionota-cBdellovibrioniaA-oUBA1018-fUBA6935-gUBA6935-sUBA6935:0.9304074803):0.0518620128[42],(GCA_011773445_1436-dBacteria-pDesulfobacterota-cBSN033-oBSN033-fWVXP01-gWVXP01-sWVXP01:0.6506630185,GCA_903924805_1211-dBacteria-pDesulfobacterota-cSM23-61-oWTBG01-fCAIYCZ01-gCAIYCZ01-sCAIYCZ01:0.5122728515):0.1121622333[62]):0.0961476048[74],((GCA_001873995_1254-dBacteria-pOmnitrophota-cKoll11-oUBA1572-fUBA1572-gUM-FILTER-44-12-sUM-FILTER-44-12:0.6952103295,GCA_013287965_1244-dBacteria-pOmnitrophota-cKoll11-oUBA10015-fGCA-002753745-gJABDGZ01-sJABDGZ01:0.5085949496):0.1574642272[82],GCA_002877985_820-dBacteria-pDesulfobacterota-cThermodesulfobacteria-oThermodesulfobacteriales-fThermodesulfobacteriaceae-gThermodesulfobacterium-sThermodesulfobacterium:0.7651824558):0.1362116068[85]):0.0902640145[76],((GCA_005223145_1101-dBacteria-pAcidobacteriota-cB3-B38-oB3-B38-fB3-B38-gB3-B38-sB3-B38:0.7286037837,(GCA_002383325_2384-dBacteria-pAcidobacteriota-cAminicenantia-oAminicenantales-fUBA4085-gUBA4085-sUBA4085:0.3456652597,(FWA021_PR1041_blk003_contig20597_2:0.2522092000,PAA010_GuaymasIMG10_blk001_contig29867_2:0.4618799937):0.0946864798[60]):0.4961893102[100]):0.0945100747[70],GCA_005239945_819-dBacteria-pUBA9089-cCG2-30-40-21-oCG2-30-40-21-fSBAY01-gSBAY01-sSBAY01:0.6029315070):0.0587441118[13]):0.0686711723[16],((((((GCA_011047655_985-dBacteria-pNitrospirota-cThermodesulfovibrionia-oUBA6902-fDSMQ01-gDSMQ01-sDSMQ01:0.1897797620,(GCA_002451135_966-dBacteria-pNitrospirota-cThermodesulfovibrionia-oUBA6902-fUBA6902-gUBA6902-sUBA6902:0.2061035772,GCA_003354025_3234-dBacteria-pNitrospirota-cThermodesulfovibrionia-oUBA6902-fUBA6902-gGlo-13-sGlo-13:0.2325701795):0.0764085991[78]):0.2024104313[100],GCA_001871685_824-dBacteria-pNitrospirota-cThermodesulfovibrionia-oThermodesulfovibrionales-fUBA1546-gUBA1546-sUBA1546:0.2615376337):0.0731233620[54],(GCA_003170655_2347-dBacteria-pNitrospirota-cThermodesulfovibrionia-oThermodesulfovibrionales-fUBA9935-gFen-1308-sFen-1308:0.2607884495,GCA_002299835_83-dBacteria-pNitrospirota-cThermodesulfovibrionia-oThermodesulfovibrionales-fUBA9935-gUBA665-sUBA665:0.2306797472):0.1046070348[85]):0.0704602777[52],GCA_002339325_1834-dBacteria-pNitrospirota-cThermodesulfovibrionia-oThermodesulfovibrionales-fThermodesulfovibrionaceae-gThermodesulfovibrio-sThermodesulfovibrio:0.5172258440):0.1093043158[73],GCA_002753395_2327-dBacteria-pNitrospirota-cThermodesulfovibrionia-oThermodesulfovibrionales-fMagnetobacteriaceae-gMagnetobacterium-sMagnetobacterium:0.4663661001):0.2016662147[90],(GCA_002500605_297-dBacteria-pNitrospinota-cUBA7883-oUBA7883-fUBA7883-gUBA7883-sUBA7883:0.8155077544,GCA_903930515_2296-dBacteria-pRBG-13-61-14-cRBG-13-61-14-oRBG-13-61-14-fDRUE01-gCAIYYW01-sCAIYYW01:0.7967881073):0.2032118670[74]):0.0050789323[6]):0.0210718923[15],(GCA_013151935_667-dBacteria-pNitrospirota-cNitrospiria-oSBBL01-fJAADHI01-gJAADHI01-sJAADHI01:0.6720396517,GCA_001803705_2103-dBacteria-pNitrospirota-cUBA9217-oUBA9217-fUBA9217-gGWC2-56-14-sGWC2-56-14:0.6061246087):0.1252851307[60]):0.0537536656[46],(((((((((((GCA_903929735_27-dBacteria-pPatescibacteria-cPaceibacteria-oUBA9983A-fUBA9973-gUBA8515-sUBA8515:0.1283237241,GCA_001785575_366-dBacteria-pPatescibacteria-cPaceibacteria-oUBA9983A-fUBA9973-gMFUC01-sMFUC01:0.2609336943):0.0147474911[43],GCA_903862255_472-dBacteria-pPatescibacteria-cPaceibacteria-oUBA9983A-fUBA9973-gUBA4124-sUBA4124:0.2155012820):0.1146762024[99],GCA_001821155_255-dBacteria-pPatescibacteria-cPaceibacteria-oUBA9983A-fUBA11359A-gUBA10002-sUBA10002:0.2675784324):0.0757212619[74],GCA_002401445_458-dBacteria-pPatescibacteria-cPaceibacteria-oUBA9983A-fGCA-2401445-gGCA-2401445-sGCA-2401445:0.3886488513):0.0235786643[34],GCA_002327585_214-dBacteria-pPatescibacteria-cPaceibacteria-oUBA9983A-fUBA2163-gUBA2163-sUBA2163:0.2775058911):0.2300148489[97],GCA_002747955_31-dBacteria-pPatescibacteria-cPaceibacteria-oUBA9983A-fGCA-2747955-gGCA-2747955-sGCA-2747955:0.8381833965):0.3299236234[100],GCA_002339755_692-dBacteria-pPatescibacteria-cABY1-oUBA2591-fUBA2591-gUBA2591-sUBA2591:0.7979265436):0.0981322003[89],GCA_003553445_1607-dBacteria-pCG03-cSLGR01-oSLGR01-fSLGR01-gPWEK01-sPWEK01:0.6690552629):0.0977801901[73],(GCA_002307015_2212-dBacteria-pSpirochaetota-cSpirochaetia-oTreponematales-fUBA1318-gUBA1318-sUBA1318:0.7712428734,GCA_002690945_562-dBacteria-pProteobacteria-cGammaproteobacteria-oSAR86-fTMED112-gTMED112-sTMED112:0.9467584365):0.1300981605[60]):0.1377205396[74],((GCA_002753225_1644-dBacteria-pDesulfobacterota-cDesulfobacteria-oDesulfobacterales-fYD0425bin51-gYD0425bin51-sYD0425bin51:0.4667151037,(GCF_004319545_3774-dBacteria-pDesulfobacterota-cDesulfobacteria-oDesulfobacterales-fDesulfobacteraceae-gDesulfobacter-sDesulfobacter:0.7417986182,(((GCA_903909505_4306-dBacteria-pDesulfobacterota-cDesulfobacteria-oDesulfobacterales-fDesulfatirhabdiaceae-gRAAP-1-sRAAP-1:0.2645807718,GCA_011389855_1594-dBacteria-pDesulfobacterota-cDesulfobacteria-oDesulfobacterales-fDesulfococcaceae-gJAABTD01-sJAABTD01:0.3427909466):0.0795346690[82],GCA_002328165_882-dBacteria-pDesulfobacterota-cDesulfobacteria-oDesulfobacterales-fUBA2156-gUBA2156-sUBA2156:0.2547174973):0.0419802444[44],GCF_903231505_676-dBacteria-pDesulfobacterota-cDesulfobacteria-oDesulfobacterales-fCAFBRK01-gCAFBRK01-sCAFBRK01:0.4593812991):0.0880863901[60]):0.0805960928[60]):0.2829148879[100],((GCF_011125455_1549-dBacteria-pChlamydiota-cChlamydiia-oChlamydiales-fParachlamydiaceae-gHS-T3-sHS-T3:0.5184542825,(((GCA_013815395_2492-dBacteria-pChlamydiota-cChlamydiia-oChlamydiales-fParachlamydiaceae-gJACDGH01-sJACDGH01:0.2696619691,GCA_013289325_434-dBacteria-pChlamydiota-cChlamydiia-oChlamydiales-fParachlamydiaceae-gJABDAE01-sJABDAE01:0.4548060696):0.1324653588[88],GCA_013288825_1749-dBacteria-pChlamydiota-cChlamydiia-oChlamydiales-fParachlamydiaceae-gJABDBC01-sJABDBC01:0.4165499542):0.1281431764[73],GCA_013821265_1381-dBacteria-pChlamydiota-cChlamydiia-oChlamydiales-fParachlamydiaceae-gJACDHD01-sJACDHD01:0.3863155088):0.1026755118[78]):0.0692245419[69],GCF_000750955_1769-dBacteria-pChlamydiota-cChlamydiia-oChlamydiales-fCriblamydiaceae-gCriblamydia-sCriblamydia:0.7208447836):0.5070476622[100]):0.0708726354[53]):0.0412159139[48],(((((((GCA_013377005_381-dBacteria-pBacteroidota-cBacteroidia-oBacteroidales-fJACABE01-gJACABE01-sJACABE01:0.3508012412,((GCA_002390775_1504-dBacteria-pBacteroidota-cBacteroidia-oFlavobacteriales-fSalibacteraceae-gSHAN690-sSHAN690:0.4795456290,(GCA_005772895_844-dBacteria-pBacteroidota-cBacteroidia-oAKYH767-f2-12-FULL-35-15-g2-12-FULL-35-15-s2-12-FULL-35-15:0.2508075463,(GCA_013298715_909-dBacteria-pBacteroidota-cBacteroidia-oAKYH767-fB-17BO-gUBA2475-sUBA2475:0.4298209401,GCA_900299295_1377-dBacteria-pBacteroidota-cBacteroidia-oAKYH767-fB-17BO-gAM-1111-sAM-1111:0.2617380643):0.1344509830[96]):0.0717977128[84]):0.0448175761[67],(PAA002_GuaymasIMG02_blk004_contig54942_1:0.4237424367,PAA004_GuaymasIMG04_blk007_contig158238_2:0.4702517939):0.1338435743[88]):0.0787659199[86]):0.0557737335[58],(GCA_003648575_1293-dBacteria-pBacteroidota-cBacteroidia-oBacteroidales-fB18-G4-gB18-G4-sB18-G4:0.3668821530,GCA_002869315_1517-dBacteria-pBacteroidota-cBacteroidia-oBacteroidales-fF082-gBM524-sBM524:0.2690926349):0.1639307350[98]):0.0380976212[60],((((GCA_002345675_2933-dBacteria-pBacteroidota-cBacteroidia-oBacteroidales-fBBW3-gUBA2287-sUBA2287:0.3180491581,GCA_003818205_2167-dBacteria-pBacteroidota-cBacteroidia-oBacteroidales-fBBW3-gUBA8529-sUBA8529:0.3371853722):0.0790345429[71],GCA_002345825_2697-dBacteria-pBacteroidota-cBacteroidia-oBacteroidales-fBBW3-gUBA5261-sUBA5261:0.2535025611):0.2122921603[99],GCA_902769525_697-dBacteria-pBacteroidota-cBacteroidia-oBacteroidales-fUBA932-gUBA1232-sUBA1232:0.6892810315):0.1218591059[97],((GCA_004214185_611-dBacteria-pBacteroidota-cBacteroidia-oFlavobacteriales-fFlavobacteriaceae-gMAG-121220-bin8-sMAG-121220-bin8:0.4601323502,GCF_002934445_1215-dBacteria-pBacteroidota-cBacteroidia-oFlavobacteriales-fFlavobacteriaceae-gNonlabens-sNonlabens:0.3182100724):0.2671852796[100],GCF_902728305_424-dBacteria-pBacteroidota-cBacteroidia-oFlavobacteriales-fWeeksellaceae-gChryseobacterium-sChryseobacterium:0.6159555657):0.0869426925[91]):0.0521322532[72]):0.0742944028[61],(GCA_003973505_1657-dBacteria-pBacteroidota-cBacteroidia-oBacteroidales-fUBA1556-gQNXT01-sQNXT01:0.5700563952,GCA_900314935_419-dBacteria-pBacteroidota-cBacteroidia-oBacteroidales-fBacteroidaceae-gPrevotella-sPrevotella:0.6385419573):0.0588637498[81]):0.0822403525[92],(((GCA_013042795_814-dBacteria-pBacteroidota-cBacteroidia-oChitinophagales-fSaprospiraceae-gRFSX01-sRFSX01:0.5474355624,((GCA_013001465_1241-dBacteria-pBacteroidota-cBacteroidia-oChitinophagales-fUBA8649-gJABDMM01-sJABDMM01:0.4859672664,GCA_903919075_2052-dBacteria-pBacteroidota-cBacteroidia-oChitinophagales-fLD1-gBog-950-sBog-950:0.3360108759):0.1043960924[71],GCA_003448375_432-dBacteria-pBacteroidota-cBacteroidia-oChitinophagales-fBACL12-gUBA11426-sUBA11426:0.3867868728):0.1561671859[96]):0.0539545259[30],((GCF_003071345_2600-dBacteria-pBacteroidota-cBacteroidia-oChitinophagales-fChitinophagaceae-gChitinophaga-sChitinophaga:0.2649933106,(GCF_007971385_3850-dBacteria-pBacteroidota-cBacteroidia-oChitinophagales-fChitinophagaceae-gArachidicoccus-sArachidicoccus:0.3180299526,GCF_900167075_1614-dBacteria-pBacteroidota-cBacteroidia-oChitinophagales-fChitinophagaceae-gSediminibacterium-sSediminibacterium:0.0824269143):0.0913499315[99]):0.0647584983[81],GCF_003014535_4391-dBacteria-pBacteroidota-cBacteroidia-oChitinophagales-fChitinophagaceae-gEdaphocola-sEdaphocola:0.2560380822):0.2663581684[100]):0.0697182775[75],(((GCF_005166025_3137-dBacteria-pBacteroidota-cBacteroidia-oCytophagales-fCyclobacteriaceae-gFabibacterA-sFabibacterA:0.2549070556,((GCF_014202275_1647-dBacteria-pBacteroidota-cBacteroidia-oCytophagales-fSpirosomaceae-gRhabdobacter-sRhabdobacter:0.2676958257,GCF_009905725_3351-dBacteria-pBacteroidota-cBacteroidia-oCytophagales-fSpirosomaceae-gLeadbetterella-sLeadbetterella:0.4162043931):0.1100951551[93],GCA_013297765_2726-dBacteria-pBacteroidota-cBacteroidia-oCytophagales-fCytophagaceae-gREBA01-sREBA01:0.2515478936):0.0431564360[73]):0.0864680438[92],(((GCF_003259615_2007-dBacteria-pBacteroidota-cBacteroidia-oSphingobacteriales-fSphingobacteriaceae-gPedobacter-sPedobacter:0.2300130970,GCA_013288685_2429-dBacteria-pBacteroidota-cBacteroidia-oSphingobacteriales-fSphingobacteriaceae-gMucilaginibacter-sMucilaginibacter:0.2104939136):0.1034629314[94],GCA_903838995_500-dBacteria-pBacteroidota-cBacteroidia-oSphingobacteriales-fCAIKLP01-gCAIKLP01-sCAIKLP01:0.3152324745):0.0928787763[73],GCA_013824115_1846-dBacteria-pBacteroidota-cBacteroidia-oUBA7662-fUBA7662-gPNNG01-sPNNG01:0.5136788125):0.0715055420[74]):0.0865772674[88],GCA_002340355_1900-dBacteria-pBacteroidota-cBacteroidia-oCytophagales-fBernardetiaceae-gUBA2561-sUBA2561:0.5361707743):0.0657076080[89]):0.0374453153[52]):0.1737486998[100],((GCA_007132385_2182-dBacteria-pBacteroidota-cRhodothermia-oBalneolales-fBalneolaceae-gSLOU01-sSLOU01:0.3500029116,(GCF_900129315_3156-dBacteria-pBacteroidota-cRhodothermia-oBalneolales-fBalneolaceae-gAliifodinibius-sAliifodinibius:0.2344408418,(GCA_007118695_3433-dBacteria-pBacteroidota-cRhodothermia-oBalneolales-fBalneolaceae-gSKRC01-sSKRC01:0.3499959071,(GCF_001650905_676-dBacteria-pBacteroidota-cRhodothermia-oBalneolales-fBalneolaceae-gBalneola-sBalneola:0.2378937892,GCA_009711805_371-dBacteria-pBacteroidota-cRhodothermia-oBalneolales-fBalneolaceae-gMES10-sMES10:0.1644951258):0.1035021713[99]):0.0844287706[85]):0.0556201992[77]):0.2855560854[100],(GCA_003022535_189-dBacteria-pBacteroidota-cRhodothermia-oRhodothermales-fSalinibacteraceae-gQS-8-64-10-sQS-8-64-10:0.3380052161,GCA_009908945_2504-dBacteria-pBacteroidota-cRhodothermia-oRhodothermales-fSalinibacteraceae-gTc-Br11-B2g6-7-sTc-Br11-B2g6-7:0.2057416129):0.3730346229[100]):0.0737078713[88]):0.0643613580[83],((GCA_011047755_1199-dBacteria-pBacteroidota-cIgnavibacteria-oCh128b-fCh128b-gCh128b-sCh128b:0.5275923772,GCA_005792285_776-dBacteria-pBacteroidota-cUBA10030-oUBA10030-fUBA8401-gSXSI01-sSXSI01:0.6596834351):0.1171236310[61],((GCA_000724175_1746-dBacteria-pBacteroidota-cChlorobia-oChlorobiales-fChloroherpetonaceae-gGBChlB-sGBChlB:0.2443066546,GCF_000020525_2688-dBacteria-pBacteroidota-cChlorobia-oChlorobiales-fChloroherpetonaceae-gChloroherpeton-sChloroherpeton:0.3701164587):0.1900969380[96],GCA_014359355_2523-dBacteria-pKSB1-cUBA2214-oJACIZP01-fJACIZP01-gJACIZP01-sJACIZP01:0.6501790005):0.1047402401[73]):0.1148728256[78]):0.2285016430[100]):0.0236246211[42]):0.0502219351[46],((((((((((((IMGVR3contig2291602_93-VirTax-undefined-HostTax-Bacteria-Firmicutes-Erysipelotrichia-Erysipelotrichales-Erysipelotrichaceae-Massilimicrobiota-:0.5300844426,GCA_001312445_2971-dBacteria-pFirmicutes-cBacilli-oErysipelotrichales-fErysipelatoclostridiaceae-gCoprobacillus-sCoprobacillus:0.0928702733):0.1232951226[98],GCA_900550005_101-dBacteria-pFirmicutes-cBacilli-oErysipelotrichales-fErysipelatoclostridiaceae-gBeduini-sBeduini:0.3642959947):0.0772177406[51],GCF_003925875_2951-dBacteria-pFirmicutes-cBacilli-oErysipelotrichales-fErysipelatoclostridiaceae-gIntestinibaculum-sIntestinibaculum:0.2740757480):0.1691291537[82],GCF_001029265_221-dBacteria-pFirmicutes-cBacilli-oMycoplasmatales-fMycoplasmataceae-gSpiroplasma-sSpiroplasma:0.7263215649):0.1383888869[72],(((GCA_012800355_744-dBacteria-pFirmicutes-cBacilli-oErysipelotrichales-fErysipelotrichaceae-gUBA1783-sUBA1783:0.4851588915,((GCA_003510215_229-dBacteria-pFirmicutes-cBacilli-oErysipelotrichales-fErysipelotrichaceae-gUBA2227-sUBA2227:0.3771005423,GCA_002422065_739-dBacteria-pFirmicutes-cBacilli-oErysipelotrichales-fErysipelotrichaceae-gUBA6182-sUBA6182:0.5465980080):0.1545103696[96],GCF_900167375_1967-dBacteria-pFirmicutes-cBacilli-oErysipelotrichales-fErysipelotrichaceae-gAnaerorhabdus-sAnaerorhabdus:0.4580820892):0.0422157964[50]):0.0703347624[57],(GCF_000154285_1504-dBacteria-pFirmicutes-cBacilli-oErysipelotrichales-fErysipelotrichaceae-gAmedibacillus-sAmedibacillus:0.2377187686,GCA_900754615_1822-dBacteria-pFirmicutes-cBacilli-oErysipelotrichales-fErysipelotrichaceae-gHoldemanella-sHoldemanella:0.4069957805):0.1560798852[92]):0.0754411461[46],(GCA_902795875_555-dBacteria-pFirmicutes-cBacilli-oErysipelotrichales-fErysipelotrichaceae-gUBA636-sUBA636:0.4391842002,GCA_002315565_586-dBacteria-pFirmicutes-cBacilli-oErysipelotrichales-fErysipelotrichaceae-gUBA636-sUBA636:0.4763148058):0.1132097694[90]):0.0848895114[62]):0.0918143574[77],GCA_003864555_290-dBacteria-pFirmicutes-cBacilli-oZOR0006-fBHER01-gBHER01-sBHER01:0.7695740842):0.0729054692[65],(GCA_902793315_59-dBacteria-pFirmicutes-cBacilli-oRF39-fUBA660-gUBA3789-sUBA3789:0.3529250790,((GCA_012520435_183-dBacteria-pFirmicutes-cBacilli-oRF39-fUBA660-gJAAYOI01-sJAAYOI01:0.1924281255,GCA_902783405_219-dBacteria-pFirmicutes-cBacilli-oRF39-fUBA660-gRUG12867-sRUG12867:0.2961478834):0.0966306590[86],GCF_002285055_170-dBacteria-pFirmicutes-cBacilli-oIzemoplasmatales-fIzemoplasmataceae-gIzemopslasmaC-sIzemopslasmaC:1.1877463310):0.1081347512[72]):0.2174165542[99]):0.0807862106[96],(((((GCF_001311175_2221-dBacteria-pFirmicutes-cBacilli-oLactobacillales-fLactobacillaceae-gLacticaseibacillus-sLacticaseibacillus:0.2570415041,GCF_001434705_1911-dBacteria-pFirmicutes-cBacilli-oLactobacillales-fLactobacillaceae-gLacticaseibacillus-sLacticaseibacillus:0.2662867521):0.1103565133[78],GCF_003946515_777-dBacteria-pFirmicutes-cBacilli-oLactobacillales-fLactobacillaceae-gCompanilactobacillus-sCompanilactobacillus:0.3082920608):0.0785233592[69],GCF_001438655_1044-dBacteria-pFirmicutes-cBacilli-oLactobacillales-fLactobacillaceae-gPediococcus-sPediococcus:0.5000636608):0.1022401254[82],GCF_002252085_1065-dBacteria-pFirmicutes-cBacilli-oLactobacillales-fAerococcaceae-gAerococcus-sAerococcus:0.4500244612):0.0361748192[45],GCF_900129085_1949-dBacteria-pFirmicutes-cBacilli-oLactobacillales-fCarnobacteriaceae-gAtopostipes-sAtopostipes:0.5052061019):0.2186481925[100]):0.0304814140[71],(GCF_000454065_3488-dBacteria-pFirmicutes-cBacilli-oBrevibacillales-fBrevibacillaceae-gBrevibacillus-sBrevibacillus:0.4561944089,(((((((((GCA_002383285_737-dBacteria-pFirmicutes-cBacilli-oPaenibacillales-fPaenibacillaceae-gUBA4045-sUBA4045:0.2529310927,(GCA_014380705_358-dBacteria-pFirmicutes-cBacilli-oPaenibacillales-fPaenibacillaceae-gGorillibacterium-sGorillibacterium:0.2840044998,GCF_003955665_5320-dBacteria-pFirmicutes-cBacilli-oPaenibacillales-fPaenibacillaceae-gPaenibacillusE-sPaenibacillusE:0.1942321377):0.0465062305[47]):0.0706368226[74],GCF_003388735_4172-dBacteria-pFirmicutes-cBacilli-oPaenibacillales-fPaenibacillaceae-gPaenibacillusC-sPaenibacillusC:0.1856166782):0.0357214310[50],GCF_013185185_4475-dBacteria-pFirmicutes-cBacilli-oPaenibacillales-fPaenibacillaceae-gSaccharibacillus-sSaccharibacillus:0.2543872554):0.0515112602[67],GCF_000971965_799-dBacteria-pFirmicutes-cBacilli-oPaenibacillales-fPaenibacillaceae-gPaenibacillusJ-sPaenibacillusJ:0.2201719472):0.0497790039[64],GCF_000422445_3253-dBacteria-pFirmicutes-cBacilli-oPaenibacillales-fPaenibacillaceae-gPaenibacillusB-sPaenibacillusB:0.2406562574):0.2330692931[100],GCF_000615945_2007-dBacteria-pFirmicutes-cBacilli-oCaldalkalibacillales-fCaldalkalibacillaceae-gBacillusAT-sBacillusAT:0.3165403927):0.0731522641[66],GCF_000376225_1366-dBacteria-pFirmicutes-cAlicyclobacillia-oTumebacillales-fEffusibacillaceae-gEffusibacillus-sEffusibacillus:0.5109112571):0.0296425217[48],GCF_003046315_3152-dBacteria-pFirmicutes-cBacilli-oThermoactinomycetales-fThermoactinomycetaceae-gDesmospora-sDesmospora:0.4059231820):0.0345231439[67],((((((((GCF_003534205_23-dBacteria-pFirmicutes-cBacilli-oLactobacillales-fListeriaceae-gListeriaA-sListeriaA:0.4488529491,GCF_001989355_1357-dBacteria-pFirmicutes-cBacilli-oBacillalesB-fBacillaceaeC-gSiminovitchia-sSiminovitchia:0.2181709092):0.0519696931[53],GCF_007988965_2805-dBacteria-pFirmicutes-cBacilli-oBacillalesA-fPlanococcaceae-gRummeliibacillus-sRummeliibacillus:0.4170205475):0.0253359354[51],GCF_009996845_2583-dBacteria-pFirmicutes-cBacilli-oBacillalesB-fCaldibacillaceae-gRUG14133-sRUG14133:0.2147510610):0.0436895943[67],((GCF_001975785_1353-dBacteria-pFirmicutes-cBacilli-oBacillalesB-fDomibacillaceae-gDomibacillus-sDomibacillus:0.4112087759,GCF_900177535_540-dBacteria-pFirmicutes-cBacilli-oBacillales-fBacillaceaeH-gBacillusI-sBacillusI:0.2999449360):0.1044157734[90],(((GCF_900156645_401-dBacteria-pFirmicutes-cBacilli-oBacillalesD-fHalobacillaceae-gSalimicrobium-sSalimicrobium:0.3330438607,GCF_900113125_1582-dBacteria-pFirmicutes-cBacilli-oBacillalesD-fHalobacillaceae-gHalobacillus-sHalobacillus:0.2340294546):0.0367480757[74],GCA_014636475_1516-dBacteria-pFirmicutes-cBacilli-oBacillalesD-fHalobacillaceae-gHalobacillusA-sHalobacillusA:0.2548087897):0.1287602374[99],GCF_014206945_2688-dBacteria-pFirmicutes-cBacilli-oBacillalesD-fAmphibacillaceae-gGracilibacillus-sGracilibacillus:0.2923549470):0.1418755504[99]):0.0253930732[47]):0.0143336972[57],(((GCF_001969855_533-dBacteria-pFirmicutes-cBacilli-oBacillales-fBacillaceae-gBacillus-sBacillus:0.2804114769,GCF_002156875_2440-dBacteria-pFirmicutes-cBacilli-oBacillales-fBacillaceaeG-gGottfriedia-sGottfriedia:0.4396977149):0.0566682061[55],(GCF_900103525_755-dBacteria-pFirmicutes-cBacilli-oBacillalesB-fDSM-18226-gNeobacillus-sNeobacillus:0.2330150645,(GCF_000750005_175-dBacteria-pFirmicutes-cBacilli-oBacillales-fAnoxybacillaceae-gGeobacillus-sGeobacillus:0.2350333631,GCF_000836725_402-dBacteria-pFirmicutes-cBacilli-oBacillales-fAnoxybacillaceae-gAnoxybacillus-sAnoxybacillus:0.2427737650):0.0415659563[65]):0.0168060039[28]):0.0202578714[57],GCF_014138605_3925-dBacteria-pFirmicutes-cBacilli-oBacillalesB-fDSM-1321-gPeribacillus-sPeribacillus:0.2930486758):0.0392072978[50]):0.0446354856[75],GCF_000334155_21-dBacteria-pFirmicutes-cBacilli-oBacillalesH-fBacillaceaeD-gBacillusAN-sBacillusAN:0.3624506373):0.0395391118[59],GCF_009818105_4372-dBacteria-pFirmicutes-cBacilli-oBacillalesG-fAnaerobacillaceaeA-gAnaerobacillusA-sAnaerobacillusA:0.3108699976):0.0252944096[50],GCF_000430745_3879-dBacteria-pFirmicutes-cBacilli-oBacillalesG-fFictibacillaceae-gFictibacillusA-sFictibacillusA:0.2966650485):0.1533096326[99]):0.0823307766[79]):0.0925661542[85]):0.0898192712[90],(((GCF_001407835_13-dBacteria-pFirmicutesA-cClostridia-oTissierellales-fPeptoniphilaceae-gLagierella-sLagierella:0.8222159988,GCA_002410325_3298-dBacteria-pFirmicutesB-cSyntrophomonadia-oSyntrophomonadales-fSyntrophomonadaceae-gUBA5314-sUBA5314:0.6701475198):0.1495513260[78],GCA_013619125_1473-dBacteria-pFirmicutesA-cClostridia-oTissierellales-fGPF-1-gGPF-1-sGPF-1:0.8726728455):0.0433403115[68],(GCA_000437515_711-dBacteria-pFirmicutesA-cClostridiaA-oChristensenellales-fBorkfalkiaceae-gUBA10281-sUBA10281:0.4768373088,GCA_902797945_258-dBacteria-pFirmicutesA-cClostridiaA-oChristensenellales-fBorkfalkiaceae-gUBA10281-sUBA10281:0.2891687817):0.5841536145[100]):0.0908535114[68]):0.0500988646[46],((((((((GCA_014306095_1917-dBacteria-pFirmicutesA-cClostridia-oPeptostreptococcales-fAnaerovoracaceae-gUBA1191-sUBA1191:0.1966876819,GCA_900543485_74-dBacteria-pFirmicutesA-cClostridia-oPeptostreptococcales-fAnaerovoracaceae-gUBA1191-sUBA1191:0.2606951580):0.0497094265[45],(GCA_900547295_1037-dBacteria-pFirmicutesA-cClostridia-oPeptostreptococcales-fAnaerovoracaceae-gUMGS973-sUMGS973:0.2428228198,GCA_902796875_236-dBacteria-pFirmicutesA-cClostridia-oPeptostreptococcales-fAnaerovoracaceae-gUBA1191-sUBA1191:0.2969829498):0.0677658799[67]):0.1109315758[94],(GCA_902776725_315-dBacteria-pFirmicutesA-cClostridia-oPeptostreptococcales-fAnaerovoracaceae-gRUG11214-sRUG11214:0.4404855382,GCA_012744355_1216-dBacteria-pFirmicutesA-cClostridia-oPeptostreptococcales-fAnaerovoracaceae-gJAAYHV01-sJAAYHV01:0.4129343972):0.0837693567[69]):0.3268936492[100],((GCA_902785365_1340-dBacteria-pFirmicutesA-cClostridia-oOscillospirales-fAcutalibacteraceae-gRuminococcusE-sRuminococcusE:0.5366029148,GCA_002437245_541-dBacteria-pFirmicutesA-cClostridia-oOscillospirales-fAcutalibacteraceae-gCAG-180-sCAG-180:0.5367509627):0.0913625846[47],((((GCA_009778605_932-dBacteria-pFirmicutesA-cClostridia-oOscillospirales-fRuminococcaceae-gRuminiclostridiumE-sRuminiclostridiumE:0.3036411307,GCA_009777415_1141-dBacteria-pFirmicutesA-cClostridia-oOscillospirales-fRuminococcaceae-gRuminiclostridiumE-sRuminiclostridiumE:0.3625948703):0.1592330230[96],GCF_900768705_863-dBacteria-pFirmicutesA-cClostridia-oOscillospirales-fRuminococcaceae-gCAG-115-sCAG-115:0.4392992666):0.1700333731[66],GCA_009782265_1462-dBacteria-pFirmicutesA-cClostridia-oOscillospirales-fRuminococcaceae-gRuminiclostridiumE-sRuminiclostridiumE:0.4657125242):0.1687285939[93],GCF_900770195_114-dBacteria-pFirmicutesA-cClostridia-oOscillospirales-fRuminococcaceae-gRuminococcusC-sRuminococcusC:0.6081987372):0.1670808348[81]):0.2247813920[100]):0.1091879746[92],((((((((((GCF_000789395_1037-dBacteria-pFirmicutesA-cClostridia-oClostridiales-fClostridiaceae-gClostridium-sClostridium:0.2336678006,(GCA_900766315_1397-dBacteria-pFirmicutesA-cClostridia-oClostridiales-fClostridiaceae-gClostridium-sClostridium:0.2697138253,GCF_002006345_5135-dBacteria-pFirmicutesA-cClostridia-oClostridiales-fClostridiaceae-gClostridium-sClostridium:0.1869630367):0.0640765424[53]):0.0530063952[56],(GCF_900130055_651-dBacteria-pFirmicutesA-cClostridia-oClostridiales-fClostridiaceae-gClostridiumT-sClostridiumT:0.2856830712,GCA_902785295_1759-dBacteria-pFirmicutesA-cClostridia-oClostridiales-fClostridiaceae-gClostridium-sClostridium:0.2298411323):0.0288703397[46]):0.0365195706[45],(GCF_000686705_3472-dBacteria-pFirmicutesA-cClostridia-oClostridiales-fClostridiaceae-gClostridiumZ-sClostridiumZ:0.2732372653,GCF_900142075_1665-dBacteria-pFirmicutesA-cClostridia-oClostridiales-fClostridiaceae-gClostridiumAA-sClostridiumAA:0.2076123343):0.0684080713[75]):0.0323596122[52],(GCF_001403615_5306-dBacteria-pFirmicutesA-cClostridia-oClostridiales-fClostridiaceae-gDesnuesiella-sDesnuesiella:0.3062277028,GCF_002934235_2073-dBacteria-pFirmicutesA-cClostridia-oClostridiales-fClostridiaceae-gClostridiumL-sClostridiumL:0.2897667947):0.0529556314[40]):0.0412136354[54],GCA_002298125_900-dBacteria-pFirmicutesA-cClostridia-oClostridiales-fClostridiaceae-gUBA701-sUBA701:0.3471170981):0.0238372503[43],((((GCF_000447315_3956-dBacteria-pFirmicutesA-cClostridia-oClostridiales-fClostridiaceae-gClostridiumJ-sClostridiumJ:0.2165699905,GCF_001877035_4481-dBacteria-pFirmicutesA-cClostridia-oClostridiales-fClostridiaceae-gClostridiumAD-sClostridiumAD:0.3186876976):0.0841691771[74],(GCF_900095445_2540-dBacteria-pFirmicutesA-cClostridia-oClostridiales-fClostridiaceae-gUBA3947-sUBA3947:0.2872646670,(GCF_001705235_2071-dBacteria-pFirmicutesA-cClostridia-oClostridiales-fClostridiaceae-gClostridiumS-sClostridiumS:0.2730061752,GCF_000389635_4852-dBacteria-pFirmicutesA-cClostridia-oClostridiales-fClostridiaceae-gClostridiumI-sClostridiumI:0.2539106346):0.0982060517[86]):0.0519547167[67]):0.0392523734[50],(((GCF_001623875_18-dBacteria-pFirmicutesA-cClostridia-oClostridiales-fClostridiaceae-gClostridiumAM-sClostridiumAM:0.1604742525,(GCF_003600355_2609-dBacteria-pFirmicutesA-cClostridia-oClostridiales-fClostridiaceae-gJN-1-sJN-1:0.2699527252,GCF_902809985_3032-dBacteria-pFirmicutesA-cClostridia-oClostridiales-fClostridiaceae-gClostridiumB-sClostridiumB:0.2359104372):0.0667068288[59]):0.0559930997[58],GCF_014050525_1858-dBacteria-pFirmicutesA-cClostridia-oClostridiales-fClostridiaceae-gClostridiumB-sClostridiumB:0.3669170531):0.0405475221[56],GCF_000204565_8-dBacteria-pFirmicutesA-cClostridia-oClostridiales-fClostridiaceae-gClostridiumH-sClostridiumH:0.3136989606):0.0236773049[30]):0.0372733828[57],((GCF_900129965_3593-dBacteria-pFirmicutesA-cClostridia-oClostridiales-fClostridiaceae-gClostridiumAF-sClostridiumAF:0.3608986510,GCF_001758365_1752-dBacteria-pFirmicutesA-cClostridia-oClostridiales-fClostridiaceae-gClostridiumC-sClostridiumC:0.3925723188):0.0224993391[42],GCF_000424205_2912-dBacteria-pFirmicutesA-cClostridia-oClostridiales-fClostridiaceae-gClostridiumX-sClostridiumX:0.2883358604):0.0598383082[50]):0.0296600650[51]):0.0380791767[49],(GCF_009295725_1861-dBacteria-pFirmicutesA-cClostridia-oClostridiales-fClostridiaceae-gClostridiumP-sClostridiumP:0.3168599883,GCF_001655775_509-dBacteria-pFirmicutesA-cClostridia-oClostridiales-fClostridiaceae-gDwaynesavagella-sDwaynesavagella:0.6536460338):0.0780689452[62]):0.1544450735[98],GCF_900129265_1631-dBacteria-pFirmicutesA-cClostridia-oClostridiales-fCaloramatoraceae-gCaloramatorA-sCaloramatorA:0.3339238819):0.1684898615[100],((((((GCA_902801415_1159-dBacteria-pFirmicutesA-cClostridia-oLachnospirales-fLachnospiraceae-gCAG-791-sCAG-791:0.3785932596,GCA_900321785_1889-dBacteria-pFirmicutesA-cClostridia-oLachnospirales-fLachnospiraceae-gCAG-791-sCAG-791:0.3852146201):0.0910738192[81],GCA_900314255_1041-dBacteria-pFirmicutesA-cClostridia-oLachnospirales-fLachnospiraceae-gUBA4285-sUBA4285:0.4864712940):0.0475549679[43],(GCA_902766735_817-dBacteria-pFirmicutesA-cClostridia-oLachnospirales-fLachnospiraceae-gEubacteriumG-sEubacteriumG:0.5075963655,GCF_000183525_1433-dBacteria-pFirmicutesA-cClostridia-oLachnospirales-fLachnospiraceae-gEubacteriumH-sEubacteriumH:0.5133473037):0.0396022588[31]):0.0665228931[53],(GCF_000424285_2397-dBacteria-pFirmicutesA-cClostridia-oLachnospirales-fLachnospiraceae-gButyrivibrio-sButyrivibrio:0.4060181329,GCF_003470905_602-dBacteria-pFirmicutesA-cClostridia-oLachnospirales-fLachnospiraceae-gRoseburia-sRoseburia:0.3714191611):0.0888518495[67]):0.0520292838[45],GCF_003043955_1940-dBacteria-pFirmicutesA-cClostridia-oLachnospirales-fLachnospiraceae-gF0428-sF0428:0.6873855683):0.0619986222[63],GCA_902796355_264-dBacteria-pFirmicutesA-cClostridia-oLachnospirales-fLachnospiraceae-gRUG842-sRUG842:0.6286214368):0.0747283864[87]):0.0393215300[72],GCA_013314855_502-dBacteria-pFirmicutesA-cClostridia-oAcetivibrionales-fDUMC01-gCh48-sCh48:0.6010945367):0.0457143654[60]):0.0509791549[81],(GCA_012800195_1496-dBacteria-pFirmicutesB-cPeptococcia-oPeptococcales-fBICA1-8-gJAAZJU01-sJAAZJU01:0.5259638079,GCA_012837705_130-dBacteria-pFirmicutesG-cUBA4882-oUBA10575-fUBA10575-gUBA11021-sUBA11021:0.5253845103):0.1404377811[77]):0.0588502993[59],(GCA_012840065_997-dBacteria-pFirmicutesC-cDUMD01-oDUMD01-fDUMD01-gDUMD01-sDUMD01:0.6087657459,((GCA_002424305_1957-dBacteria-pFirmicutesG-cSHA-98-oUBA4971-fUBA4971-gUBA4971-sUBA4971:0.5637667348,GCF_000379025_2213-dBacteria-pFirmicutesF-cHalanaerobiia-oHalobacteroidales-fHalobacteroidaceae-gOrenia-sOrenia:0.4663232850):0.1159023552[30],(((GCA_003150755_1414-dBacteria-pFirmicutesC-cNegativicutes-oAcidaminococcales-fAcidaminococcaceae-gPhascolarctobacterium-sPhascolarctobacterium:0.4828842771,GCF_900769615_1333-dBacteria-pFirmicutesC-cNegativicutes-oSelenomonadales-fSelenomonadaceae-gSelenomonasA-sSelenomonasA:0.7646394243):0.1327060809[92],GCA_009781625_1323-dBacteria-pFirmicutesA-cClostridia-oLachnospirales-fWRAX01-gWRBK01-sWRBK01:0.7865332199):0.1020260832[63],(GCA_012523785_455-dBacteria-pDTU030-cDTU030-oDTU030-fDTU030-gJAAYTH01-sJAAYTH01:0.3796376919,GCA_012839445_179-dBacteria-pDTU030-cDTU030-oDUMP01-fDUMP01-gDUNI01-sDUNI01:0.3888538554):0.2102392315[99]):0.0297208485[18]):0.0087605360[12]):0.0735652764[58]):0.0126678414[43],((GCF_006094395_2389-dBacteria-pFirmicutes-cBacilli-oStaphylococcales-fStaphylococcaceae-gStaphylococcus-sStaphylococcus:0.8300606541,GCF_014206945_2690-dBacteria-pFirmicutes-cBacilli-oBacillalesD-fAmphibacillaceae-gGracilibacillus-sGracilibacillus:0.4606103523):0.3250113822[99],(GCA_900316485_195-dBacteria-pFirmicutesA-cClostridia-oOscillospirales-fAcutalibacteraceae-gUBA1213-sUBA1213:1.4328728669,GCA_012799055_1836-dBacteria-pFirmicutesA-cClostridia-oTissierellales-fTepidimicrobiaceae-gJAAZMA01-sJAAZMA01:0.7257074193):0.3330200152[88]):0.4711418518[99]):0.0368165030[52]):0.0407415865[60],(GCA_003165595_1614-dBacteria-pFibrobacterota-cChitinivibrionia-oChitinivibrionales-fChitinispirillaceae-gFEN-1185-sFEN-1185:0.9138415065,(GCF_000092845_570-dBacteria-pSpirochaetota-cBrachyspirae-oBrachyspirales-fBrachyspiraceae-gBrachyspira-sBrachyspira:0.7773499345,GCA_012518115_1421-dBacteria-pBacteroidota-cKapabacteria-oKapabacteriales-fUBA2268-gJAAYTD01-sJAAYTD01:0.6311635146):0.1227213686[56]):0.1022107110[77]):0.0400883937[32]):0.0164019979[35],((((((((GCA_002348185_453-dBacteria-pHydrogenedentota-cHydrogenedentia-oHydrogenedentiales-fSLHB01-gUBA2224-sUBA2224:0.2177799607,FWA003_FW4391Hyb_blk004_contig22755_2:0.4431893206):0.1235256723[91],GCA_903893795_2215-dBacteria-pHydrogenedentota-cHydrogenedentia-oHydrogenedentiales-fCAITNO01-gCAITNO01-sCAITNO01:0.2224296362):0.1012293599[90],((GCA_012730105_3418-dBacteria-pHydrogenedentota-cHydrogenedentia-oHydrogenedentiales-fCAITNO01-gJAAYBJ01-sJAAYBJ01:0.0923348039,GCA_012523015_142-dBacteria-pHydrogenedentota-cHydrogenedentia-oHydrogenedentiales-fCAITNO01-gJAAYBJ01-sJAAYBJ01:0.3077866077):0.2228029650[100],GCA_011046175_541-dBacteria-pHydrogenedentota-cHydrogenedentia-oHydrogenedentiales-fCAITNO01-gSLFT01-sSLFT01:0.1841654355):0.1586031861[100]):0.3301922068[100],(GCF_004919105_1123-dBacteria-pActinobacteriota-cActinomycetia-oPropionibacteriales-fNocardioidaceae-gNocardioides-sNocardioides:0.4109203799,GCF_002871795_1779-dBacteria-pActinobacteriota-cActinomycetia-oActinomycetales-fDermabacteraceae-gBrachybacterium-sBrachybacterium:0.3262098225):0.5665739320[100]):0.0909156770[75],(((((GCA_003152315_3591-dBacteria-pVerrucomicrobiota-cVerrucomicrobiae-oPalsa-1439-fPalsa-1439-gPalsa-1439-sPalsa-1439:0.5172729936,(GCA_003176035_1238-dBacteria-pVerrucomicrobiota-cVerrucomicrobiae-oChthoniobacterales-fXiphinematobacteraceae-gPSRL01-sPSRL01:0.5388441121,GCA_013695925_2064-dBacteria-pVerrucomicrobiota-cVerrucomicrobiae-oChthoniobacterales-fUBA10450-gPalsa-1392-sPalsa-1392:0.2884831596):0.2776094982[99]):0.1865629546[97],GCA_002305615_520-dBacteria-pVerrucomicrobiota-cVerrucomicrobiae-oPedosphaerales-fUBA1412-gUBA1412-sUBA1412:0.7799543283):0.0661813833[64],GCA_008636095_1081-dBacteria-pVerrucomicrobiota-cKiritimatiellae-oJAAZAB01-fVSJD01-gVSJD01-sVSJD01:0.7349740739):0.0487026093[48],GCA_003159495_2124-dBacteria-pGoldbacteria-cPGYV01-oPGYV01-fPalsa-1178-gBog-1181-sBog-1181:0.9689850737):0.0823182951[66],GCA_903893785_1932-dBacteria-pLatescibacterota-cUBA2968-oUBA8231-fUBA8231-gCAITNQ01-sCAITNQ01:0.7793149318):0.0281538823[21]):0.0881163359[45],(((((GCF_002973605_3011-dBacteria-pArmatimonadota-cAbditibacteria-oAbditibacteriales-fAbditibacteriaceae-gAbditibacterium-sAbditibacterium:0.7893242352,GCA_012517375_491-dBacteria-pWOR-3-cWOR-3-oB3-TA06-fB3-TA06-gB3-TA06-sB3-TA06:0.9855594220):0.1236124770[38],PAA003_GuaymasIMG03_blk012_contig619246_1:1.0897967106):0.1073611640[28],(GCA_002414865_1199-dBacteria-pFermentibacterota-cFermentibacteria-oFermentibacterales-fFermentibacteraceae-gUBA5938-sUBA5938:0.6103547134,GCF_000014905_16-dBacteria-pAcidobacteriota-cAcidobacteriae-oBryobacterales-fBryobacteraceae-gSolibacter-sSolibacter:0.9361984816):0.1335974645[39]):0.0904609102[35],((GCF_001999965_2483-dBacteria-pPlanctomycetota-cPhycisphaerae-oSedimentisphaerales-fSedimentisphaeraceae-gLimihaloglobus-sLimihaloglobus:0.4270470707,PAA004_GuaymasIMG04_blk008_contig196587_1:0.4178421344):0.3454485267[100],FWA003_FW4391Hyb_blk003_contig7970_8:0.6029323712):0.1610847370[93]):0.0952557657[37],((GCA_013816485_307-dBacteria-pPlanctomycetota-cUBA11346-oUBA11346-fUBA11346-gBOG-1363-sBOG-1363:1.0062821708,GCA_003154095_4702-dBacteria-pMyxococcota-cPolyangia-oPolyangiales-fPolyangiaceae-gFEN-1139-sFEN-1139:0.6093169485):0.1940643428[81],GCF_003611675_6644-dBacteria-pMyxococcota-cMyxococcia-oMyxococcales-fMyxococcaceae-gCorallococcus-sCorallococcus:0.6223242189):0.1114428540[66]):0.0727163408[36]):0.0454533232[41],GCA_009783055_132-dBacteria-pAcidobacteriota-cHolophagae-oHolophagales-fHolophagaceae-gWRHW01-sWRHW01:1.1736985879):0.0648679286[22],(GCF_000350165_683-dBacteria-pFirmicutesF-cHalanaerobiia-oHalanaerobiales-fHalanaerobiaceae-gHalanaerobium-sHalanaerobium:0.8054309826,(((((GCF_902627495_1094-dBacteria-pProteobacteria-cGammaproteobacteria-oBurkholderiales-fUBA3031-gGCA-2704665-sGCA-2704665:0.6045887959,GCA_900545335_157-dBacteria-pProteobacteria-cGammaproteobacteria-oBurkholderiales-fBurkholderiaceae-gCAG-521-sCAG-521:0.5838607230):0.0546753263[55],GCA_902566725_472-dArchaea-pThermoproteota-cNitrososphaeria-oNitrososphaerales-fNitrosopumilaceae-gNitrosopelagicus-sNitrosopelagicus:0.6891094699):0.0723123282[78],(((((((GCF_900115655_1723-dBacteria-pProteobacteria-cGammaproteobacteria-oEnterobacterales-fSuccinivibrionaceae-gRuminobacter-sRuminobacter:0.8497532136,GCF_001758345_1727-dBacteria-pProteobacteria-cGammaproteobacteria-oPseudomonadales-fMoraxellaceae-gAcinetobacter-sAcinetobacter:0.5960540997):0.0568420507[28],(GCF_003149435_390-dBacteria-pProteobacteria-cGammaproteobacteria-oNitrococcales-fNitrococcaceae-gE85-sE85:0.3709848734,PAA007_GuaymasIMG07_blk001_contig200_19:0.4355443981):0.1257316600[90]):0.0443016050[16],GCA_002311315_1494-dBacteria-pProteobacteria-cGammaproteobacteria-oMethylococcales-fUBA2778-gUBA1147-sUBA1147:0.5258701235):0.0230198176[14],GCA_013414725_809-dBacteria-pProteobacteria-cGammaproteobacteria-oUBA6002-fUBA6002-gCCA-013414725-sCCA-013414725:0.4583271955):0.0223870447[16],FWA021_PR1041_blk004_contig85804_2:0.4133273566):0.0486484064[37],((((GCA_002299245_109-dBacteria-pProteobacteria-cGammaproteobacteria-oThiomicrospirales-fThiomicrospiraceae-gThiomicrorhabdus-sThiomicrorhabdus:0.5512813955,GCF_900112445_1887-dBacteria-pProteobacteria-cGammaproteobacteria-oThiomicrospirales-fThiomicrospiraceae-gThiomicrospira-sThiomicrospira:0.3920922938):0.1865429979[97],GCA_002338385_502-dBacteria-pProteobacteria-cGammaproteobacteria-oUBA4575-fUBA4575-gUBA1858-sUBA1858:0.6933000890):0.0396113026[34],GCA_903885895_2223-dBacteria-pProteobacteria-cGammaproteobacteria-oLegionellales-fLegionellaceae-gGCA-2786165-sGCA-2786165:1.0284120638):0.0407677976[55],GCA_903875455_2141-dBacteria-pProteobacteria-cGammaproteobacteria-oMethylococcales-fMethylomonadaceae-gCAIQWF01-sCAIQWF01:0.7091582752):0.0878230759[66]):0.0577992502[31],GCA_013001905_1711-dBacteria-pProteobacteria-cGammaproteobacteria-oGCA-2729495-fGCA-2729495-gGCA-2729495-sGCA-2729495:0.4526149865):0.1138294819[79]):0.1560929560[99],(((((GCF_009828095_2143-dBacteria-pProteobacteria-cAlphaproteobacteria-oSphingomonadales-fSphingomonadaceae-gPontixanthobacter-sPontixanthobacter:0.2183614158,GCF_009827435_3086-dBacteria-pProteobacteria-cAlphaproteobacteria-oSphingomonadales-fSphingomonadaceae-gCroceibacterium-sCroceibacterium:0.1665606741):0.5460401999[100],GCF_004345735_463-dBacteria-pProteobacteria-cAlphaproteobacteria-oRhodobacterales-fRhodobacteraceae-gRhodovulum-sRhodovulum:0.3955052919):0.1263278693[86],GCA_002483465_1635-dBacteria-pProteobacteria-cAlphaproteobacteria-oMicavibrionales-fMicavibrionaceae-gUBA7657-sUBA7657:0.6404092019):0.0688434488[62],(((GCA_002697745_2743-dBacteria-pProteobacteria-cAlphaproteobacteria-oRhizobiales-fRhizobiaceae-gNitratireductor-sNitratireductor:0.4676500745,GCF_001579845_245-dBacteria-pProteobacteria-cAlphaproteobacteria-oRhizobiales-fXanthobacteraceae-gZ2-YC6860-sZ2-YC6860:0.5192369053):0.1999481067[97],(GCF_002251735_1843-dBacteria-pProteobacteria-cAlphaproteobacteria-oElsterales-fElsteraceae-gElstera-sElstera:0.5513671614,GCA_903931735_949-dBacteria-pProteobacteria-cAlphaproteobacteria-oAzospirillales-fAzospirillaceae-gCAIZDL01-sCAIZDL01:0.4003722012):0.1884181326[92]):0.0896359432[76],GCA_002401545_89-dBacteria-pProteobacteria-cAlphaproteobacteria-oSphingomonadales-fEmcibacteraceae-gEmcibacterA-sEmcibacterA:0.4656945040):0.0937979560[79]):0.1499438349[89],(GCA_002372275_917-dBacteria-pProteobacteria-cAlphaproteobacteria-oRF32-fCAG-239-gUBA1254-sUBA1254:0.8662023441,(GCA_902623395_690-dBacteria-pProteobacteria-cAlphaproteobacteria-oPelagibacterales-fPelagibacteraceae-gPelagibacterA-sPelagibacterA:0.7321040367,(GCA_902517315_118-dBacteria-pProteobacteria-cAlphaproteobacteria-oHIMB59-fGCA-002718135-gAG-337-I02-sAG-337-I02:0.4754750947,GCA_002717485_689-dBacteria-pProteobacteria-cAlphaproteobacteria-oHIMB59-fGCA-002718135-gGCA-2717485-sGCA-2717485:0.4101761235):0.2858973261[99]):0.0810033615[57]):0.1200703486[62]):0.1093464056[80]):0.1401036773[84],(GCA_003135315_1319-dBacteria-pAcidobacteriota-cAcidobacteriae-oAcidobacteriales-fKoribacteraceae-gBog-257-sBog-257:0.9718689139,(((GCA_012797375_644-dBacteria-pAcidobacteriota-cAminicenantia-oAminicenantales-fUBA4085-gJAAZPG01-sJAAZPG01:1.4816606042,GCA_011605775_323-dArchaea-pThermoproteota-cNitrososphaeria-oNitrososphaerales-fJAAOZN01-gJAAOZN01-sJAAOZN01:1.8167235083):0.1021797842[43],GCA_007693955_2938-dBacteria-pCyanobacteria-cCyanobacteriia-oCyanobacteriales-fGloeocapsaceae-gGloeocapsa-sGloeocapsa:1.6501255333):0.2520425659[64],(FWV0001_rast_peg0028_00809aa:0.5309652772,FWA016_FW4633_blk001_contig2307_10:0.3331382055)OROOT:1.0248340800[100]):0.2094930389[76]):0.0871590910[39]):0.0310070971[37]):0.0605568351[30]):0.0164019979);
