# Supplementary material for: Unique mobile elements and scalable gene flow at the prokaryote–eukaryote boundary revealed by circularized Asgard archaea genomes
Source: Nat Microbiol. 2022 Jan 13;7(2):200–12. doi: 10.1038/s41564-021-01039-y (PMC8813620; doi:10.1038/s41564-021-01039-y)
Supplement: Source Data Fig. 4 — Phylogenetic trees in Newick format. [file 41564_2021_1039_MOESM8_ESM.zip › Fig4d_source_data_newick.txt]

(((((((((ASG030_ThorGCA2775_rast_peg2446_00320aa:0.3731820668,(ASG282_GCA004524305_rast_peg0919_00321aa:0.2207892423,ASG104_Thorarchaeota021_rast_peg2789_00318aa:0.2398716703):0.0797260780[95]):0.0849024987[63],(((ASG112_Thorarchaeota066_rast_peg0602_00321aa:0.0703230030,ASG264_GCA004376265_rast_peg0774_00316aa:0.2431747651):0.0519432647[85],((((ASG246_GCA001563335_rast_peg3206_00328aa:0.1408071839,(ASG109_Thorarchaeota060_rast_peg2484_00328aa:0.1353865512,ASG253_GCA002825515_rast_peg0119_00328aa:0.0986687158):0.0206111764[77]):0.0190583162[85],(ASG124_Thorarchaeota121_rast_peg2026_00321aa:0.0829505589,ASG249_GCA001940705_rast_peg1471_00321aa:0.0928831579):0.0253758409[73]):0.0203737946[70],(ASG123_Thorarchaeota096_rast_peg3146_00321aa:0.0728709935,GCA_011364905_299-dArchaea-pAsgardarchaeota-cThorarchaeia-oThorarchaeales-fThorarchaeaceae-gSMTZ1-45-sSMTZ1-45:0.1637513680):0.0279402648[72]):0.0112537501[60],ASG103_Thorarchaeota020_rast_peg0153_00320aa:0.1693936499):0.0496400174[98]):0.1238730416[100],(((ASG107_Thorarchaeota029_rast_peg0874_00330aa:0.1878490452,ASG295_GCA004524595_rast_peg1834_00322aa:0.1437612516):0.1168929682[99],(ASG255_GCA003345545_rast_peg0369_00323aa:0.1831881214,(ASG111_Thorarchaeota065_rast_peg0462_00322aa:0.0675886182,GCA_002825535_1933-dArchaea-pAsgardarchaeota-cThorarchaeia-oThorarchaeales-fThorarchaeaceae-gMP8T-1-sMP8T-1:0.1031689994):0.0597327009[97]):0.0922575047[100]):0.0175681022[46],((((ASG294_GCA004524565_rast_peg2830_00322aa:0.0895265657,((ASG304_GCA004525645_rast_peg1380_00322aa:0.0550503502,ASG252_GCA002825465_rast_peg1703_00322aa:0.1455165977):0.0265972730[91],ASG119_Thorarchaeota083_rast_peg0424_00322aa:0.0452091999):0.0121042215[77]):0.0178961225[61],ASG303_GCA004525575_rast_peg1386_00322aa:0.0933793479):0.0197818893[49],ASG201_Thorarchaeia05_rast_peg0067_00322aa:0.1045837079):0.0407195621[71],FWA021_PR1041_blk002_contig5763_6:0.1233138363):0.1069294877[100]):0.1407057708[100]):0.0476481872[78]):0.1384629902[96],((ASG116_Thorarchaeota074_rast_peg0963_00325aa:0.2840078035,(ASG121_Thorarchaeota092_rast_peg3418_00320aa:0.4558432524,(ASG125_Thorarchaeota125_rast_peg3256_00323aa:0.1063848325,ASG118_Thorarchaeota079_rast_peg0755_00323aa:0.0949966779):0.0867060814[96]):0.0399140297[64]):0.0646018352[83],((ASG316_GCA011365025_rast_peg1709_00340aa:0.1503881273,GCA_011364985_1090-dArchaea-pAsgardarchaeota-cThorarchaeia-oThorarchaeales-fThorarchaeaceae-gSMTZ1-83-sSMTZ1-83:0.1973895075):0.1606876120[100],ASG102_Thorarchaeota019_rast_peg1796_00328aa:0.3222108336):0.2078354062[100]):0.0499805186[69]):0.0193777273[31],ASG256_GCA003345555_rast_peg1640_00339aa:0.5165917666):0.0581880969[62],(ASG198_Thorarchaeia02_rast_peg3165_00324aa:0.0566844032,GCA_013138615_141-dArchaea-pAsgardarchaeota-cThorarchaeia-oThorarchaeales-fThorarchaeaceae-gWTCK01-sWTCK01:0.0670074079):0.2826245133[100]):0.0214858923[43],(ASG001_ThorGCA0745_rast_peg2947_00324aa:0.1050333583,ASG039_ThorMgm52_rast_peg0826_00328aa:0.1131632509):0.4526310089[100]):0.0475656349[63],((ASG281_GCA004524285_rast_peg0470_00326aa:0.1884614431,ASG288_GCA004524435_rast_peg1699_00323aa:0.1794454628):0.2422065090[100],(ASG259_GCA003662805_rast_peg0143_00344aa:0.3426615655,FWA001_FW025NP_blk001_contig1345_2:0.2581701984):0.1788082293[100]):0.1009472809[85]):0.0609167423[46],ASG289_GCA004524445_rast_peg2236_00323aa:0.4127456629):0.1017005125[99],((IMGVR3contig0621279_3-VirTax-Duplodnaviria-Heunggongvirae-Uroviricota-Caudoviricetes-Caudovirales----HostTax-undefined:0.3522785711,(GCA_002506585_787-dArchaea-pHalobacteriota-cMethanomicrobia-oMethanomicrobiales-fMethanoculleaceae-gMethanoculleus-sMethanoculleus:0.2224983365,GCF_004102725_733-dArchaea-pHalobacteriota-cMethanomicrobia-oMethanomicrobiales-fMethanoculleaceae-gMethanoculleusA-sMethanoculleusA:0.3639833957):0.1009127916[85]):0.3484171650[100],(FWV0001_rast_peg0015_00325aa:0.5782924463,((((((((ASG306_GCA005191425_rast_peg2240_00312aa:0.2486458034,ASG054_Helarchaeota059_rast_peg2748_00306aa:0.3467432746):0.1446544955[99],ASG277_GCA004524205_rast_peg0228_00319aa:0.3526123423):0.0855221111[86],ASG305_GCA004526085_rast_peg1879_00341aa:0.4052213160):0.0541052775[62],FWA003_FW4391Hyb_blk002_contig3220_7:0.4738174298):0.0487296022[64],ASG031_LokiGCA2865_rast_peg2399_00304aa:0.4400982716):0.0216776467[44],((ASG308_GCA007133855_rast_peg0593_00320aa:0.3937796509,(ASG306_GCA005191425_rast_peg0917_00325aa:0.2411279986,GCA_002502705_1490-dArchaea-pThermoplasmatota-cThermoplasmata-oThermoplasmatales-fThermoplasmataceae-gUBA582-sUBA582:0.6218454151):0.1366084430[93]):0.1057970939[92],(ASG092_Lokiarchaeota113_rast_peg3629_00308aa:0.2106815051,ASG081_Lokiarchaeota025_rast_peg2943_00305aa:0.3445016520):0.2527313599[100]):0.0579856573[60]):0.1560144498[100],(((((FWG001_HeimAAGFW025Hv6_rast_peg0384_00306aa:0.1780758345,FWG166_Heimauk_rast_peg0344_00298aa:0.2609568231):0.0927132440[88],FWA021_PR1041_blk001_contig498_7:0.4266895042):0.0842854070[64],ASG132_Heimdallarchaeia02_rast_peg1399_00312aa:0.3383085405):0.0706259065[79],(((ASG050_Heimdallarchaeota087_rast_peg2846_00301aa:0.1208470205,GCA_013166775_2662-dArchaea-pAsgardarchaeota-cHeimdallarchaeia-oUBA460-fUBA460-gUBA460-sUBA460:0.1139125913):0.1767678951[100],(ASG052_Heimdallarchaeota104_rast_peg1770_00300aa:0.1846510546,ASG050_Heimdallarchaeota087_rast_peg0654_00301aa:0.2528136995):0.0626818629[71]):0.0394965029[78],((ASG135_Heimdallarchaeia05_rast_peg3457_00300aa:0.0920112186,(ASG051_Heimdallarchaeota099_rast_peg1999_00309aa:0.0799887752,ASG010_HeimAAGAB125_rast_peg1215_00309aa:0.0720688361):0.0541989643[80]):0.1158113129[99],ASG300_GCA004524685_rast_peg0320_00300aa:0.2342662309):0.0642149141[55]):0.2027809825[100]):0.1789263740[100],(((((ASG108_Thorarchaeota058_rast_peg2525_00303aa:0.1949609252,ASG203_Thorarchaeia07_rast_peg0568_00300aa:0.2265206251):0.0507350178[56],(ASG110_Thorarchaeota064_rast_peg2733_00307aa:0.2121257138,ASG114_Thorarchaeota068_rast_peg2264_00317aa:0.1822481602):0.0568664200[96]):0.0873504784[86],(GCA_013388835_2441-dArchaea-pAsgardarchaeota-cThorarchaeia-oThorarchaeales-fThorarchaeaceae-gJACAEL01-sJACAEL01:0.3831432380,FWA021_PR1041_blk003_contig24882_3:0.3613627886):0.0632642609[62]):0.0790482584[73],((GCF_902812485_1225-dArchaea-pThermoproteota-cNitrososphaeria-oNitrososphaerales-fCADDZS01-gCADDZS01-sCADDZS01:0.3717993090,GCA_002726865_1096-dArchaea-pThermoproteota-cBathyarchaeia-oTCS64-fTCS64-gGCA-2726865-sGCA-2726865:0.3575159994):0.0505826685[50],GCA_013288145_354-dArchaea-pThermoproteota-cNitrososphaeria-oNitrososphaerales-fCADDZS01-gJABDCJ01-sJABDCJ01:0.4434480085):0.1844480971[99]):0.0915699030[71],((GCA_002495905_632-dArchaea-pThermoproteota-cNitrososphaeria-oNitrososphaerales-fUBA57-gUBA57-sUBA57:0.1645369608,GCA_013378385_850-dArchaea-pThermoproteota-cNitrososphaeria-oNitrososphaerales-fUBA57-gUBA57-sUBA57:0.1642635329):0.1216652183[83],GCA_002693165_713-dArchaea-pThermoproteota-cNitrososphaeria-oNitrososphaerales-fUBA57-gUBA57-sUBA57:0.2061573828):0.4162834359[100]):0.0690645879[58]):0.1682560200[100]):0.0442763121[45],(ASG172_Lokiarchaeia22_rast_peg1848_00324aa:0.5879814932,(((FWG169_LokiFW102v12_rast_peg2749_00311aa:0.4483061262,(ASG003_LokibMKD1_rast_peg2459_00312aa:0.1404361173,FWA013_FW4244mh_blk003_contig278340_8:0.1704463498):0.1616128909[100]):0.1280850626[99],ASG005_HelSZ384_rast_peg1732_00328aa:0.3835290277):0.2234813556[100],ASG077_Hodarchaeota126_rast_peg2996_00328aa:0.5179434681):0.0345390882[57]):0.0475083194[50]):0.0740195270[71])OROOT:0.1221857870[78]):0.1017005125);
